1 **Cellular acidosis triggers MondoA transcriptional activity by driving mitochondrial ATP**  
2 **production**

3

4 Blake R. Wilde<sup>1,2</sup>, Zhizhou Ye<sup>1,2</sup>, Donald E. Ayer<sup>1,3\*</sup>

5 <sup>1</sup>Department of Oncological Sciences, Huntsman Cancer Institute, University of Utah, Salt Lake  
6 City, UT 84112, USA

7 <sup>2</sup>These authors contributed equally

8 <sup>3</sup>Lead Contact

9

10 \*Correspondence: don.ayer@hci.utah.edu

11

12 **ABSTRACT**

13 MondoA and its transcriptional target thioredoxin-interacting protein (TXNIP) constitute a  
14 regulatory loop that senses glycolytic flux and controls glucose availability. Cellular stress also  
15 triggers MondoA activity and TXNIP expression. To understand how MondoA integrates glucose  
16 and stress signals, we studied its activation by acidosis. We found that acidosis drives  
17 mitochondrial ATP (mtATP) synthesis. The subsequent export of mtATP from mitochondria via  
18 adenine-nucleotide transporter and voltage-dependent anion channel, and the enzymatic activity  
19 of mitochondria-bound hexokinase results in the production of glucose-6-phosphate (G6P), a  
20 known activator of MondoA transcriptional activity. MondoA localizes to the outer-mitochondrial  
21 membrane (OMM), and in response to G6P, shuttles to the nucleus and activates transcription. Our  
22 data suggests that MondoA is a required feature of a glucose- and mtATP-dependent, OMM-  
23 localized signaling center. We propose MondoA functions as a coincidence detector and its ability  
24 to sense glucose and cellular stress is coupled to the concerted production of G6P.

25

## 26 INTRODUCTION

27           Glucose is a major source of carbons for the production of ATP and biosynthetic  
28 intermediates. Dysregulation of glucose uptake and metabolism underlies many diseases including  
29 cancer and diabetes (Petersen et al., 2017, Hay, 2016). Thus, it is important to understand the  
30 precise molecular mechanisms that regulate glucose homeostasis in normal and pathological  
31 settings.

32           The paralogous transcription factors MondoA and ChREBP (MondoB) are sentinel  
33 regulators of glucose-induced transcription and their activity is highly, if not entirely, dependent  
34 on glucose (Stoltzman et al., 2008, Richards et al., 2017, Peterson et al., 2010, Stoltzman et al.,  
35 2011, Ma et al., 2005). Work by our lab and others has established glucose-6-phosphate (G6P) as  
36 a key regulatory signal that drives Mondo transcriptional activity (Stoltzman et al., 2008, Li et al.,  
37 2010). Other hexose-6-phosphates, fructose-2,6-bisphosphate, and xylulose-5-phosphate are also  
38 thought to drive Mondo-dependent transcription, yet the molecular mechanisms are not well-  
39 defined (Kabashima et al., 2003, Petrie et al., 2013, Stoltzman et al., 2011).

40           MondoA controls the glucose-dependent expression of thioredoxin-interacting protein  
41 (TXNIP), which has a number of critical cellular functions (Anderson, 2016, Shalev, 2014, O'Shea  
42 and Ayer, 2013). The best characterized among these is as a suppressor of glucose uptake  
43 (Stoltzman et al., 2008, Wu et al., 2013, Hui et al., 2008). Thus, MondoA and TXNIP – the  
44 MondoA/TXNIP axis – make up a negative feedback loop that maintains cellular glucose  
45 homeostasis. High TXNIP is anti-correlated with glucose uptake in human tumors and is a  
46 predictor of better overall survival in cancer patients, establishing the MondoA/TXNIP axis as an  
47 important prognostic factor in cancer (Lim et al., 2012, Chen et al., 2010, Shen et al., 2015).

48           MondoA shuttles from the outer mitochondrial membrane (OMM) to the nucleus where it  
49 drives transcriptional circuits that control cellular fuel choice (Billin et al., 2000, Sans et al., 2006,  
50 Stoltzman et al., 2008). In addition to being regulated by glucose, a functional electron transport  
51 chain (ETC) is also required for MondoA-dependent transcription (Yu et al., 2010, Han and Ayer,  
52 2013), yet the ETC-derived signal remains unknown. It is also unclear how glycolytic and  
53 mitochondrial signals converge to regulate MondoA transcriptional activity. Nevertheless, because  
54 MondoA responds to both glycolysis and mitochondrial respiration, MondoA may function as a  
55 master sensor of cellular energy charge.

56           TXNIP expression is driven by a number of cellular stresses. For example, serum  
57 starvation, lactic acidosis/low pH, ultraviolet and gamma irradiation, endoplasmic-reticulum stress

58 and microgravity (Elgort et al., 2010, Chen et  
59 al., 2010, Junn et al., 2000, Versari et al., 2013,  
60 Osowski et al., 2012). However, little is  
61 known about how TXNIP expression is  
62 regulated by this diverse collection of signals.  
63 TXNIP expression is highly, if not entirely,  
64 dependent on MondoA and glucose,  
65 suggesting that at least some of these stresses  
66 may impact MondoA activity and/or the  
67 availability of glucose-derived metabolites.

68 Intracellular acidification is a  
69 metabolic stress intrinsic to proliferative cells  
70 that results from increased glycolytic flux and  
71 consequent lactate production. Cancer cells  
72 initiate a homeostatic response to intracellular  
73 acidification to restore physiological pH that  
74 includes export of lactate, slowing of glycolysis and restricting glucose uptake (Webb et al., 2011,  
75 Gunnink et al., 2014). pH-regulation of glycolytic flux and proton transport have been well-studied  
76 (Webb et al., 2011), and our previous work suggests a role for the MondoA/TXNIP axis in  
77 normalizing cellular pH. For example, lactic acidosis triggers MondoA-dependent TXNIP  
78 expression and decreased glucose uptake (Chen et al., 2010). This suppression of glucose uptake  
79 requires both MondoA and TXNIP, yet how lactic acidosis activates MondoA transcriptional  
80 activity was not investigated.

81 Here we show that acidic pH drives MondoA transcriptional activity by increasing  
82 mitochondrial ATP (mtATP) synthesis. mtATP is used by mitochondria-bound hexokinase to  
83 generate G6P from cytoplasmic glucose, which subsequently drives MondoA nuclear  
84 accumulation and transcriptional activity. These results suggest a critical role for the  
85 MondoA/TXNIP axis in coordinating the transcriptional and metabolic response to the cell's  
86 principal energy sources, glucose and mtATP, and in maintaining energy homeostasis in response  
87 to nutrient hyper-abundance.

88

## 89 RESULTS

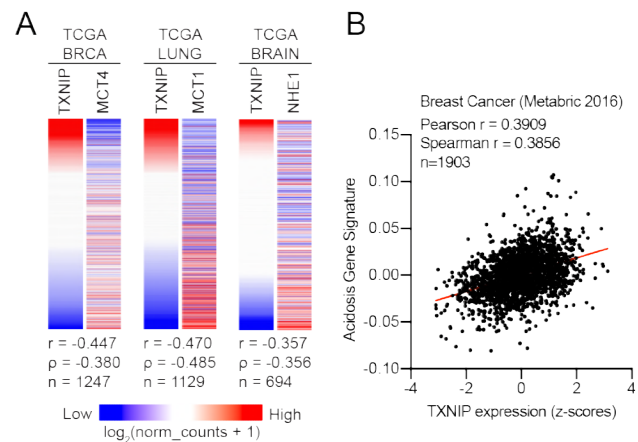

**Figure 1. TXNIP correlates with genes that regulate intracellular pH.** (A) Heatmaps depicting the expression of TXNIP mRNA compared to MCT4 (breast cancer), MCT1 (lung cancer) and NHE1 (brain cancer). All expression data was collected from TCGA. Spearman and Pearson correlation statistics are reported as  $r$  and  $\rho$ , respectively. (B) An acidosis gene signature was determined for the 2016 METABRIC breast cancer dataset. These scores were compared to TXNIP expression from the dataset and correlation statistics were performed.

90  
 91 **Low pH medium drives MondoA-**  
 92 **dependent TXNIP expression**

93 We previously showed that lactic  
 94 acidosis triggers the MondoA/TXNIP axis  
 95 (Chen et al., 2010). This finding raised the  
 96 intriguing possibility that intracellular pH  
 97 modulates MondoA transcriptional activity.  
 98 Proton export is primarily regulated by the  
 99 monocarboxylate transporters (MCTs) and  
 100 sodium-hydrogen antiporter 1 (NHE1)(Webb  
 101 et al., 2011). We used publicly available gene  
 102 expression data to correlate TXNIP expression  
 103 with MCTs and NHE1. TXNIP expression is  
 104 inversely correlated with MCT4 in breast  
 105 cancer, MCT1 in lung cancer and NHE1 in  
 106 brain cancer (Figure 1A). TXNIP expression  
 107 was also anti-correlated with MCTs and  
 108 NHE1 in non-transformed tissues (Figure 1 –  
 109 figure supplement 1A-B). Further, we  
 110 identified a correlation between TXNIP  
 111 expression and an acidosis gene-signature in  
 112 breast cancer (Figure 1B). These data suggest  
 113 that intracellular pH per se, rather than a lactic  
 114 acidosis-dependent signaling event, controls  
 115 MondoA transcriptional activity.

116 To better understand the effects of acidosis on MondoA transcriptional activity, we treated  
 117 cells with Hank's balanced salt solution (HBSS), which mimics the nutrient-poor extracellular  
 118 environment cancer cells experience *in vivo*. HBSS has minimal pH-buffering capacity and in 5%  
 119 CO<sub>2</sub> has an acidic pH of ~6.4. HBSS treatment of mouse embryonic fibroblasts (MEFs) increased  
 120 TXNIP mRNA and protein expression, and decreased glucose uptake (Figure 2A-B, Figure 2 –  
 121 figure supplement 1A). HBSS is weakly buffered due to its low level of sodium bicarbonate (0.35

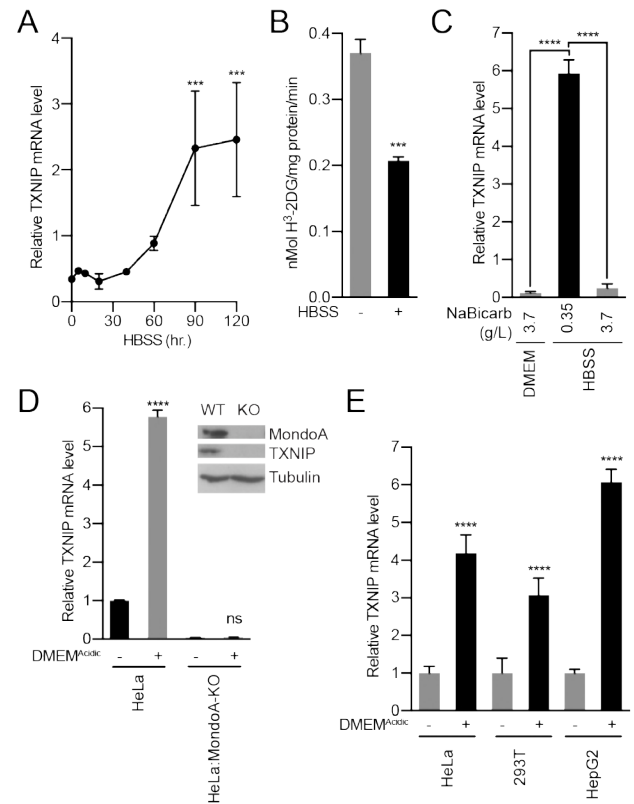

**Figure 2. Acidosis drives MondoA transcriptional activity.** (A) Mouse embryonic fibroblasts (MEFs) treated with HBSS for the indicated amounts of time and TXNIP mRNA levels were determined by reverse transcriptase-quantitative PCR (RT-qPCR). (B) Glucose uptake was determined by quantifying the rate of H<sup>3</sup>-2-deoxyglucose uptake in MEFs treated with HBSS. (C) TXNIP mRNA levels from MEFs treated with DMEM, HBSS and HBSS supplemented with sodium bicarbonate to the same level as in DMEM (3.7 g/L). (D) CRISPR/Cas9 was used to disrupt the expression of MondoA in HeLa cells. Immunoblot of HeLa and HeLa:MondoA-KO cells. Consistent with our previous findings, loss of MondoA prevented TXNIP expression. TXNIP mRNA levels from HeLa and HeLa:MondoA-KO cells treated with DMEM<sup>Acidic</sup>. (E) TXNIP mRNA levels in HEK-293T, HeLa and HepG2 cells treated with DMEM<sup>Acidic</sup>.

122 g/L). Supplementing HBSS with sodium bicarbonate to 3.7 g/L raised the pH to 7.5 and prevented  
123 TXNIP induction (Figure 2C, Figure 2 – figure supplement 1B). Conversely, decreasing sodium  
124 bicarbonate in DMEM to 0.37 g/L decreased the pH to ~6.5 and induced TXNIP expression  
125 (Figure 2D, Figure 2 – figure supplement 1C). HBSS and DMEM with low sodium-bicarbonate  
126 (DMEM<sup>Acidic</sup>) were used throughout this study to mimic extracellular acidification. To determine  
127 whether TXNIP induction is mediated by sodium bicarbonate or pH, we increased the pH of HBSS  
128 and DMEM<sup>Acidic</sup> to 7.4. This prevented TXNIP induction (Figure 2 – figure supplement 1C),  
129 confirming that low pH rather than low sodium bicarbonate is primarily responsible for HBSS-  
130 and DMEM<sup>Acidic</sup>-driven MondoA transcriptional activity.

131 MondoA is necessary and sufficient for TXNIP induction (Stoltzman et al., 2011,  
132 Stoltzman et al., 2008). Consistent with this, HBSS increased TXNIP expression in MondoA<sup>+/+</sup>  
133 MEFs but not in MondoA<sup>-/-</sup> MEFs (Figure 2 – figure supplement 2A). Reconstituting MondoA<sup>-/-</sup>  
134 MEFs with MondoA rescued TXNIP induction (Figure 2 – figure supplement 2A). Further, TXNIP  
135 was induced in HeLa cells treated DMEM<sup>Acidic</sup> but not in HeLa cells with disrupted MondoA  
136 expression (HeLa:MondoA-KO cells, Figure 2D). Finally, DMEM<sup>Acidic</sup> induced TXNIP  
137 expression in three cell lines of different lineages: HeLa, HepG2 and 293T cells (Figure 2E).

138 We next determined the effects of acidosis on MondoA transcriptional activity.  
139 Heterodimerization with Mlx is required for MondoA nuclear translocation and binding to  
140 carbohydrate responsive elements (ChoREs) in the promoters of its target genes (Stoltzman et al.,  
141 2011, Peterson et al., 2010, Minn et al., 2005, Stoltzman et al., 2008). MondoA(I766P), which  
142 does not interact with Mlx (Stoltzman et al., 2008), was unable to rescue TXNIP induction in  
143 MondoA<sup>-/-</sup> MEFs (Figure 2 – figure supplement 2A), indicating a requirement for the  
144 MondoA:Mlx heterocomplex. Further, HBSS induced the activity of a TXNIP-promoter luciferase  
145 reporter, but not when the ChoRE sequence was mutated (Figure 2 – figure supplement 2B).  
146 Finally, HBSS treatment led to increased MondoA occupancy at the TXNIP promoter (Figure 2 –  
147 figure supplement 2C). Together these data establish that acidosis drives MondoA transcriptional  
148 activity.

149

### 150 **MondoA is required for the transcriptional response to acidosis**

151 To determine the contribution of MondoA to acidosis-driven gene expression we  
152 conducted RNA-sequencing on mRNA from HeLa and HeLa:MondoA-KO cells treated with  
153 DMEM<sup>Acidic</sup> for 4 hours. Using a 1.5-fold cut off and an adjusted p-value of  $\leq 0.01$ , we identified

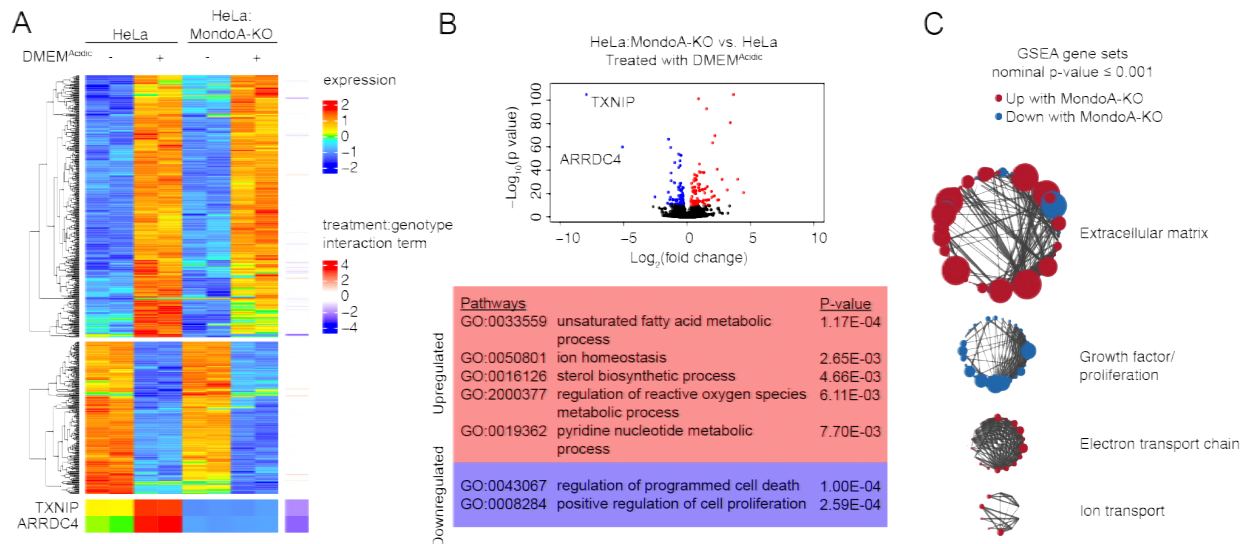

**Figure 3. The MondoA-dependent acidosis response.** RNA-sequencing was used to determine differentially regulated genes for HeLa and HeLa:MondoA-knockout cells treated with DMEM<sup>Acidic</sup> for four hours. Differentially regulated genes were determined. (A) Heatmaps depicting TXNIP, ARRDC4 and the top 500 differentially regulated genes in HeLa cells treated with DMEM<sup>Acidic</sup>. The genotype:treatment interaction term was calculated using DESeq2 and indicates the influence of both genotype and treatment on differential expression. (B) Volcano plot of  $\log_2(\text{fold-change})$  of HeLa cells treated with DMEM<sup>Acidic</sup> compared to HeLa:MondoA-KO cells treated with DMEM<sup>Acidic</sup>. Genes with an adjusted p-value  $\leq 1E-10$  that are upregulated or downregulated in HeLa:MondoA-KO cells are indicated in red and blue, respectively. Overrepresentation analysis was performed for the upregulated and downregulated genes. Enriched pathways and their respective p-values are given in the red and blue boxes for upregulated and downregulated genes, respectively. (C) GSEA and leading edge analysis was conducted for HeLa cells treated with DMEM<sup>Acidic</sup> compared to HeLa:MondoA-KO cells treated with DMEM<sup>Acidic</sup>. Depicted are networks of gene sets with a nominal p-value  $\leq 0.001$ . Node colors are representative of whether the gene set was positively (red) or negatively (blue) enriched. Node size represents gene set size. Connecting line thickness represents similarity between two nodes.

154 617 differentially regulated genes in HeLa cells treated with DMEM<sup>Acidic</sup>. Of these, 227 were not  
 155 regulated in HeLa:MondoA-KO cells, suggesting that MondoA contributes to nearly 37% of the  
 156 acidosis-driven transcriptional response. We next used regression analysis to look for genes that  
 157 are affected by both DMEM<sup>Acidic</sup> treatment and genotype. Loss of MondoA prevented the  
 158 induction/suppression of several acidosis-regulated genes; however, only two genes, TXNIP and  
 159 one of its paralogues, ARRDC4, were entirely dependent on MondoA (Figure 3A).

160 We next performed pathway analysis on genes differentially regulated in HeLa and  
 161 HeLa:MondoA-KO cells treated with DMEM<sup>Acidic</sup>. Consistent with the results above, TXNIP and  
 162 ARRDC4 were the most highly MondoA-dependent genes, with  $\log_2(\text{fold-changes})$  of 7.9 and 5.1,  
 163 respectively (Figure 3B). We identified 157 other differentially regulated genes in HeLa:MondoA-  
 164 KO cells (adjusted p-value  $\leq 1E-10$ ). Pathways that were upregulated in HeLa:MondoA-KO cells  
 165 were enriched for fatty acid metabolism, sterol biosynthesis, ion homeostasis, ROS metabolism,  
 166 and pyridine metabolism pathways, whereas cell death and proliferation pathways were



167 downregulated (Figure 3B, Figure 3 – table  
 168 supplement 1). Further, we conducted gene set  
 169 enrichment analysis (GSEA) on HeLa and  
 170 HeLa:MondoA-KO cells treated with  
 171 DMEM<sup>Acidic</sup> using all pathways in the  
 172 Molecular Signatures Database. We identified  
 173 588 gene sets that were enriched with a  
 174 nominal p-value < 0.001 (Figure 3 – table  
 175 supplement 2). Leading edge analysis  
 176 highlighted extracellular matrix remodeling,  
 177 electron transport chain and ion transport as  
 178 upregulated, and growth-factor/proliferation  
 179 as downregulated in HeLa:MondoA-KO cells  
 180 (Figure 3C). Together these data show that  
 181 MondoA is required for the transcriptional  
 182 response to DMEM<sup>Acidic</sup> treatment and  
 183 suggests that MondoA may have an essential  
 184 role in an adaptive response to acidosis.

### 186 **MondoA is dependent upon mitochondrial** 187 **ATP**

188 Given the predominant role of  
 189 MondoA in the transcriptional response to acidosis, we sought to determine how acidic pH triggers  
 190 MondoA transcriptional activity. Previous reports show that treating cells with low pH medium  
 191 drives intracellular acidification (Adams et al., 2006, Wahl et al., 2000). In an effort to determine  
 192 the intracellular site of action of low pH on MondoA activity, we used compartment-selective  
 193 ionophores to alter proton concentrations in various cellular compartments. Monensin, which  
 194 drives cytosolic alkalization, abrogated HBSS-induced TXNIP expression (Figure 4 – figure  
 195 supplement 1A). By contrast, chloroquine which disrupts acidification of endosomes/lysosomes,  
 196 had no effect on TXNIP induction (Figure 4 – figure supplement 1A). Finally, the mitochondrial  
 197 ionophore FCCP, prevented HBSS-driven TXNIP expression (Figure 4 – figure supplement 1B).  
 198 Together these results suggest that cytosolic and/or mitochondrial proton gradients, but not pH-

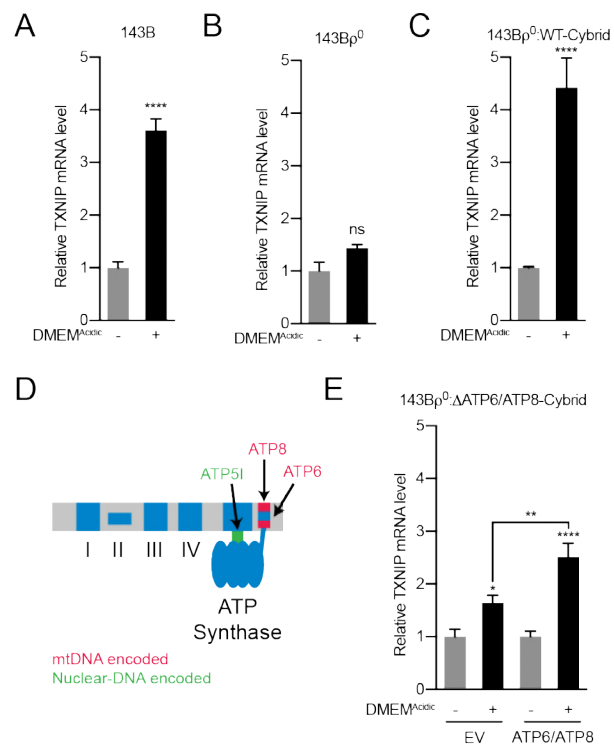

**Figure 4. Acidosis-driven MondoA transcriptional activity requires mitochondrial ATP production.** TXNIP mRNA level following treatment with DMEM<sup>Acidic</sup> in (A) 143B osteosarcoma cells, (B) 143B<sup>p0</sup> cells which lack mtDNA, and (C) 143B<sup>p0</sup>:WT-Cybrid cells which have restored wild type mitochondria. (D) Schematic depicting nuclear- and mitochondrial-DNA encoded components of the ETC. (E) TXNIP mRNA level following treatment with DMEM<sup>Acidic</sup> in 143B<sup>p0</sup>:ΔATP6/ATP8-Cybrid cells expressing empty vector or nuclear encoded, mitochondrial-targeted ATP6 and ATP8. \* p<0.05; \*\*p<0.01; \*\*\*\*p<0.0001; ns – not significant

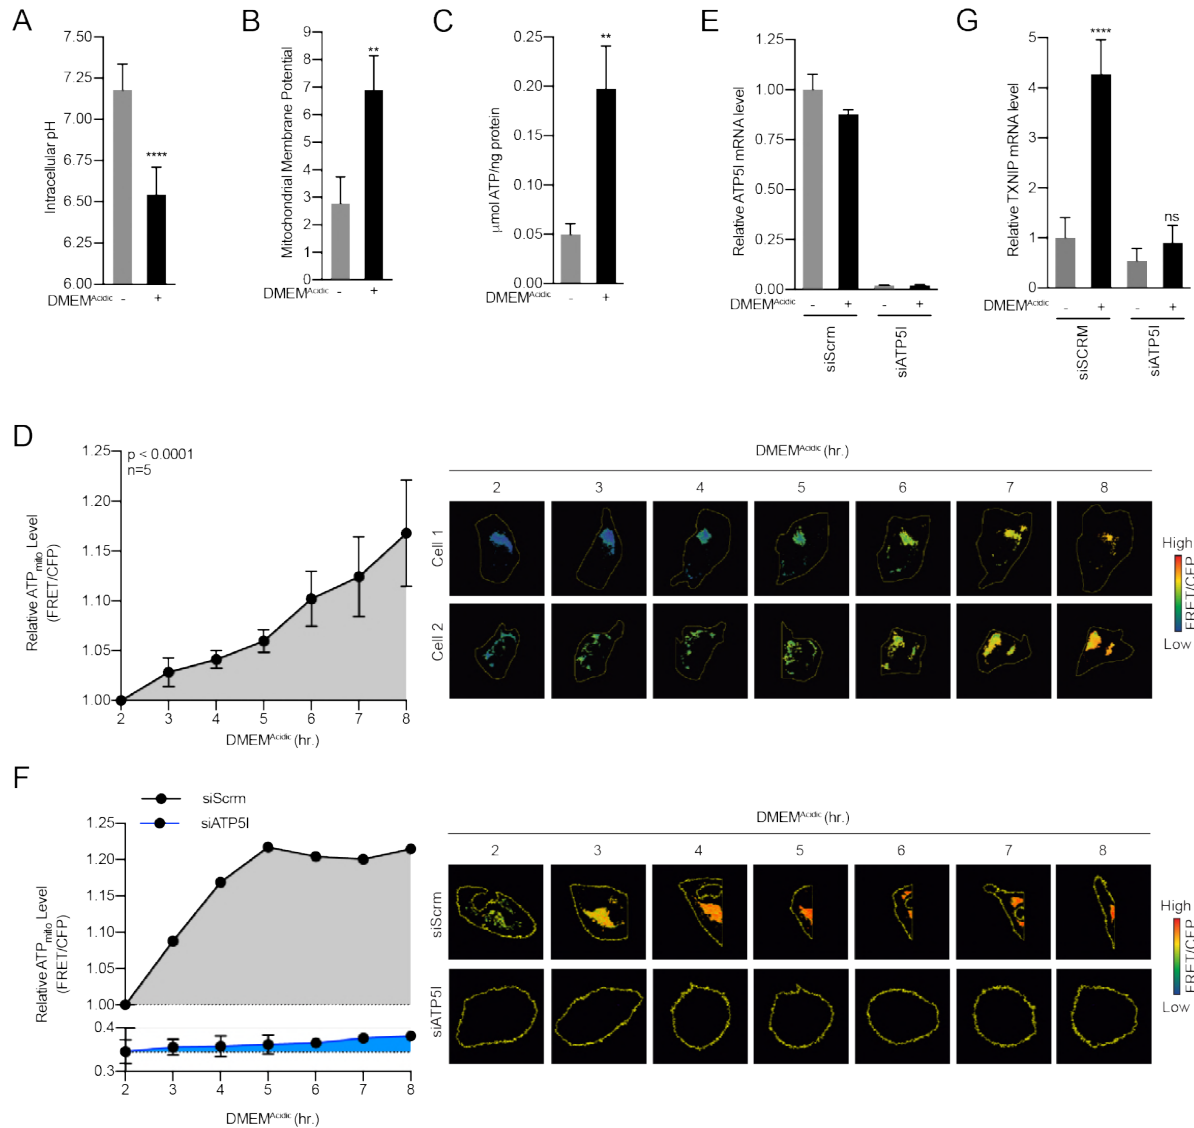

**Figure 5. Acidosis drives the synthesis of mitochondrial ATP.** (A) Intracellular pH of HeLa cells treated with DMEM<sup>Acidic</sup> as determined by BCECF-AM staining. (B) Mitochondrial membrane potential was determined by JC1 staining. (C) Total cellular ATP levels were determined using luciferase-based assay. (D) Mit-ATEAM, a mitochondrial-targeted ATP-biosensor, was used to determine how DMEM<sup>Acidic</sup> affects mitochondrial ATP. Widefield microscopy was used to capture images in the FRET and CFP channels. After images were obtained, mitochondria were analyzed for FRET and CFP signal. FRET signal was normalized using CFP. (E) ATP5I mRNA level in HeLa cells expressing scrambled (siScrm, n=1) or ATP5I-specific siRNA (siATP5I, n=2). (F) Mit-ATEAM was used to determine how DMEM<sup>Acidic</sup> affects mitochondrial ATP production in the context of siScrm or siATP5I. (G) TXNIP mRNA level following DMEM<sup>Acidic</sup> treatment of HeLa cells expressing scrambled or ATP5I-specific siRNA. \*\* p<0.01; \*\*\*\*p<0.0001; ns – not significant

199 dependent changes in the endosome/lysosome, are critical for the activation of the  
200 MondoA/TXNIP axis.

201 Cytosolic and mitochondrial protons contribute to ETC function, which cooperatively  
202 builds and consumes a proton gradient to synthesize ATP. We therefore sought to evaluate how



203 the ETC contributes to acidosis-driven MondoA activity. We used 143Bp<sup>0</sup> osteosarcoma cells,  
204 which lack mitochondrial DNA (mtDNA) and are respiration deficient (King and Attardi, 1989).  
205 TXNIP was induced in parental 143B cells treated with DMEM<sup>Acidic</sup> (Figure 4A), yet the induction  
206 of TXNIP was blunted in 143Bp<sup>0</sup> cells (Figure 4B). TXNIP induction was rescued in 143Bp<sup>0</sup> cells  
207 that had been repopulated with wild type mitochondria (143Bp<sup>0</sup>:WT-cybrid cells; Figure 4C).  
208 These genetic experiments confirm previous inhibitor studies that implicated a functional ETC in  
209 MondoA transcriptional activity (Yu et al., 2010, Han and Ayer, 2013).

210 Given the predominant role of the ETC in ATP synthesis, we determined whether  
211 mitochondrial ATP (mtATP) synthesis is required to trigger the MondoA/TXNIP axis. We used  
212 143Bp<sup>0</sup>: $\Delta$ ATP6/ $\Delta$ ATP8 cybrid cells which have a point mutation in mtDNA that disrupts  
213 expression of both ATP6 and ATP8, required components of the F<sub>0</sub>F<sub>1</sub>-ATPase (ATP synthase,  
214 Figure 4D)(Boominathan et al., 2016, Jonckheere et al., 2008). Low pH-driven TXNIP expression  
215 was blunted in these cells, yet was partially rescued in cells with nuclear-encoded,  
216 mitochondrially-targeted ATP6 and ATP8 (Figure 4E)(Boominathan et al., 2016). These results  
217 indicate that mtATP synthesis is necessary for low pH to induce MondoA transcriptional activity.  
218 Consistent with this hypothesis, the ATP synthase inhibitor oligomycin completely blocked  
219 TXNIP induction in response to DMEM<sup>Acidic</sup> (Figure 4 – figure supplement 1B).

220

## 221 **Acidosis drives the synthesis of mitochondrial ATP**

222 ETC complexes I-IV build a proton gradient by pumping protons from the mitochondrial  
223 matrix to the inner membrane space. Given that the outer mitochondrial membrane is freely  
224 permeable to protons (Cooper, 2000), we hypothesized that acidosis leads to intracellular  
225 acidification, hyperpolarization of the inner-mitochondrial membrane and ATP synthesis. Using  
226 the pH-sensitive dye BCECF-AM, we determined that DMEM<sup>Acidic</sup> treatment shifted intracellular  
227 pH from 7.2 to 6.5 (Figure 5A). The drop in pH was accompanied by an increase in mitochondrial  
228 membrane potential as measured by the dye JC1 (Figure 5B) and an increase in total cellular ATP  
229 levels (Figure 5C). Collectively these data show that treating cells with low pH medium increases  
230 total cellular ATP levels.

231 Metabolite pools from whole cells can be vastly different from those observed in specific  
232 organelles (Abu-Remaileh et al., 2017, Chen et al., 2016). We therefore sought to determine how  
233 low pH affects mtATP levels. To accomplish this, we used a mitochondrial-targeted fluorescence  
234 resonance energy transfer (FRET) ATP biosensor (Mit-ATEAM, Figure 5 – figure supplement A-

235 B). This biosensor consists of cp173-Venus fused to mseCFP via an ATP-binding linker region  
236 (Imamura et al., 2009). As a control, we used constructs with mutations in the ATP-binding linker  
237 that prevented ATP binding and FRET (Figure 5 – figure supplement 1C). HeLa cells treated with  
238 DMEM<sup>Acidic</sup> showed increased FRET over time, indicating that acidosis drives an increase in  
239 mtATP but not cytosolic ATP (Figure 5D, Figure 5 – figure supplement 1C-E).

240 We next sought to determine whether the accumulation of mtATP resulted from increased  
241 synthesis or decreased mitochondrial export. We blunted expression of ATP5I, an essential  
242 component of the ATP synthase, using siRNA-mediated knockdown (Figure 5E). Consistent with  
243 our working model, ATP5I knockdown decreased not only the steady state level of mtATP, but  
244 also the low pH-driven increase in mtATP (Figure 5F). Furthermore, ATP5I knockdown prevented  
245 TXNIP induction in response to DMEM<sup>Acidic</sup> treatment (Figure 5G). Together these data show that  
246 acidosis drives mtATP production through ATP synthase and that mtATP synthesis is required for  
247 low pH-driven MondoA transcriptional activity.

248

#### 249 **MondoA senses G6P produced by mitochondrial-hexokinase**

250 How might MondoA sense mtATP? MondoA, Mlx and hexokinase 2 (HK2) are all resident  
251 at the outer mitochondrial membrane (Figure 6A-B) (Robey and Hay, 2006, Sans et al., 2006).  
252 Mitochondria-bound HK2 has preferential access to mtATP that is exported from the mitochondria  
253 (Wilson, 2003). The enzymatic activity of HK2 transfers the terminal phosphate from ATP to  
254 glucose to generate G6P. Because G6P is a known activator of MondoA transcriptional activity,  
255 we speculated that acidosis-induced mtATP drives the synthesis of G6P to trigger MondoA  
256 transcriptional activity (Figure 6B). We have tested this model in several ways. First, we  
257 determined how acidosis alters steady-state metabolite levels. Consistent with reports showing that  
258 acidosis leads to increased mitochondrial metabolism (Lamonte et al., 2013, Chen et al., 2008,  
259 Dietl et al., 2010), DMEM<sup>Acidic</sup> drove an increase in TCA cycle intermediates (Figure 6C). By  
260 contrast, most glycolytic intermediates were decreased in response to DMEM<sup>Acidic</sup>; however, G6P  
261 levels were increased 3-fold (Figure 6C).

262 Second, we tested the contribution of the channel, comprised of the adenine-nucleotide  
263 transporter (ANT) in the inner-mitochondrial membrane and voltage-dependent anion channel  
264 (VDAC) in the outer-mitochondrial membrane, that exports mtATP from the mitochondria.  
265 Consistent with our working model, which states that mtATP must be exported from the matrix,  
266 siRNA-mediated knockdown of ANT2 prevented TXNIP induction in response to low pH medium

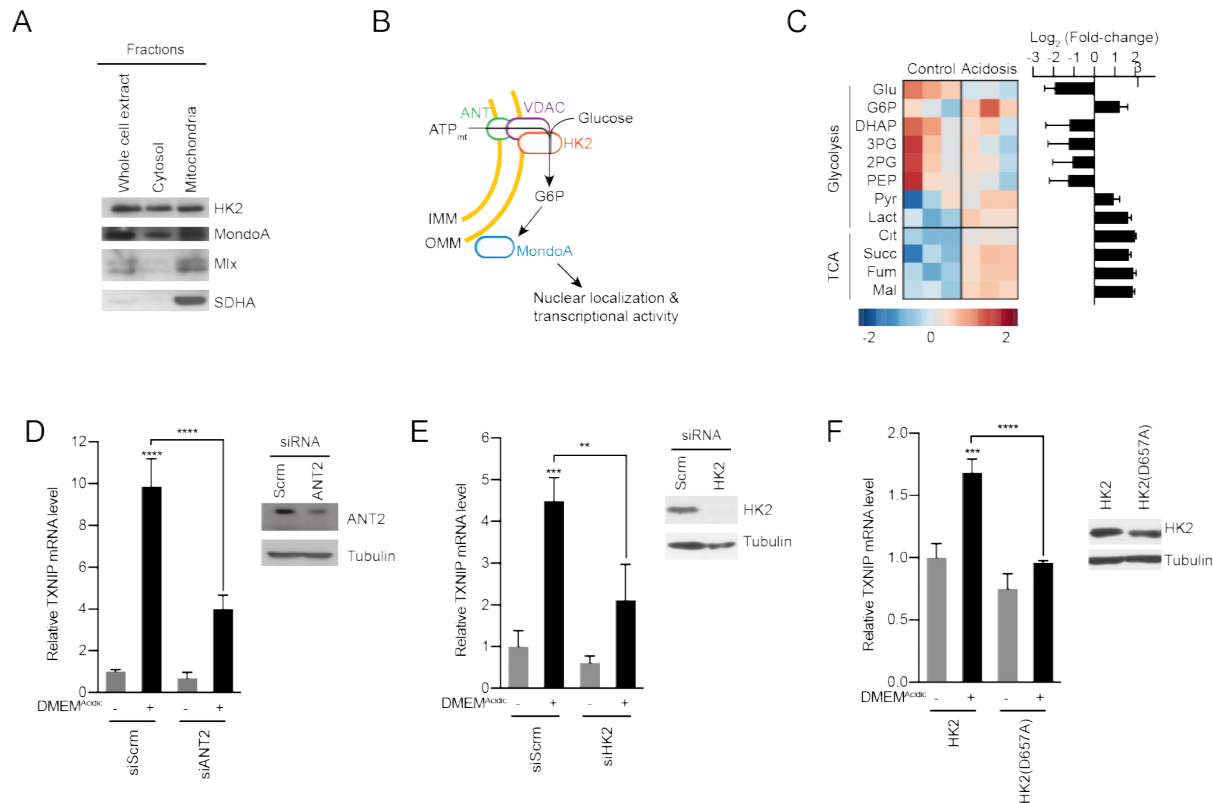

267 (Figure 6D). This finding suggests that mtATP functions outside the mitochondria to trigger  
 268 MondoA transcriptional activity, rather than by an indirect signaling-based mechanism.

269 Third, we used several approaches to test the contribution of HK2 to low pH-driven  
 270 MondoA activity. siRNA pools against HK2 blocked TXNIP induction in response to low pH  
 271 treatment (Figure 6E), demonstrating a requirement for HK2. Further, overexpression of  
 272 HK2(D657A), which lacks kinase activity (Arora et al., 1991), blocked the induction of TXNIP in  
 273 response to low pH (Figure 6F), supporting the notion that synthesis of G6P is critical for the  
 274 induction of MondoA transcriptional activity.

275 Fourth, we tested the contribution of mitochondria-localized HK2 to low pH-driven  
 276 MondoA transcriptional activity. HK2 localizes to the outer-mitochondrial membrane via  
 277 interactions with VDAC (Wilson, 2003). Ectopic expression of mVDAC(E72Q), a mutant mouse  
 278 orthologue of VDAC1, prevents the interaction between VDAC and HK2 (Abu-Hamad et al.,

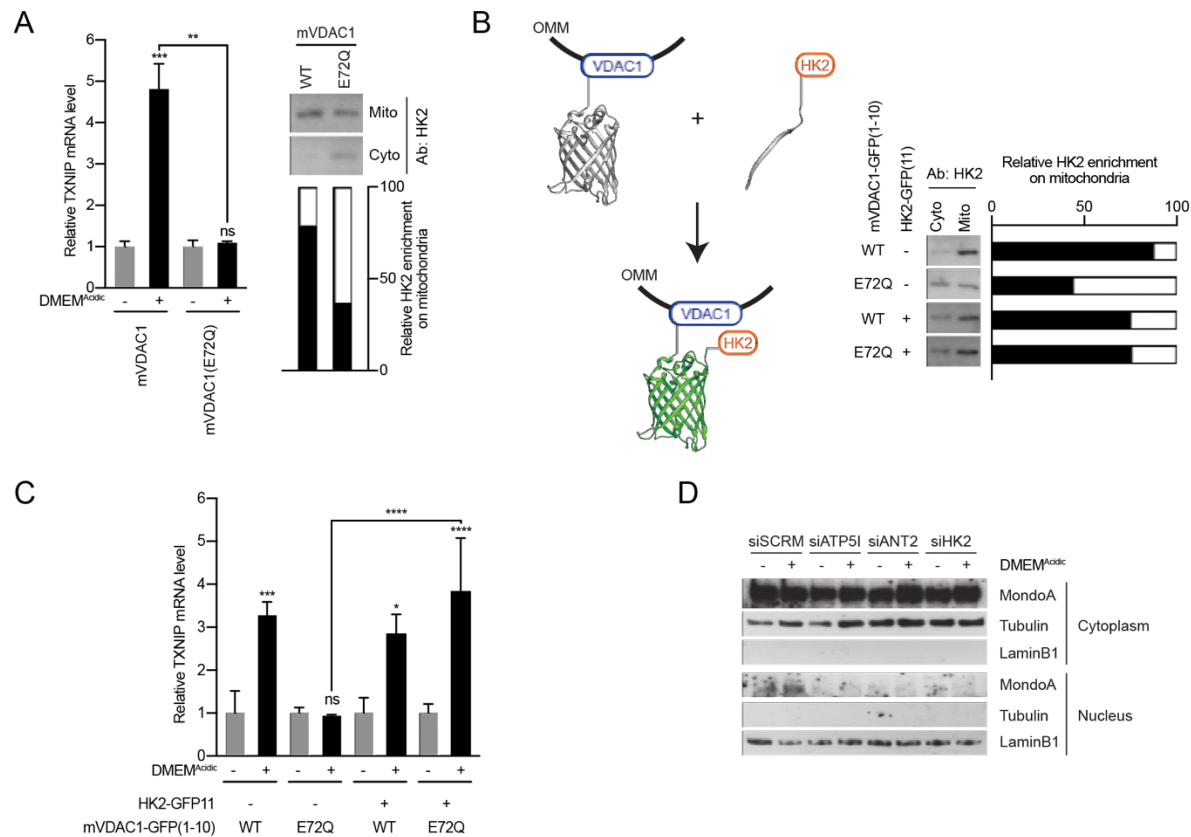

**Figure 7. MondoA senses G6P produced by mitochondrial-bound hexokinase. (A)** TXNIP mRNA levels in BJ-Tert cells expressing mVDAC1-GFP and mVDAC1(E72Q)-GFP and treated with DMEM<sup>Acidic</sup>. HK2 localization was also analyzed by cellular fractionation and densitometry was used to quantify the relative amount of HK2 on the mitochondria. Of note, HK2 became increasingly enriched in the cytoplasmic fraction. **(B)** Schematic depicting the use of GFP(1-10) and GFP(11) to artificially tether mVDAC1 and HK2. HK2 localization was also analyzed by cellular fractionation and densitometry was used to quantify the relative amount of HK2 on the mitochondria. **(C)** TXNIP mRNA levels of BJ-Tert cells treated with DMEM<sup>Acidic</sup> and expressing mVDAC1-GFP, mVDAC1(E72Q)-GFP and HK2-GFP(11). **(D)** MondoA nuclear localization was determined by cellular fractionation of HeLa cells treated with DMEM<sup>Acidic</sup> and with siSCRAM (siRNA control), siATP5I, siANT2 and siHK2. Tubulin and LaminB1 served as controls for cytoplasm and nuclei, respectively. \* p<0.05; \*\*p<0.01; \*\*\*p<0.001; \*\*\*\*p<0.0001; ns – not significant

279 2008, Zaid et al., 2005), blocked the mitochondrial localization of HK2 as expected and completely  
 280 blocked TXNIP induction in response to DMEM<sup>Acidic</sup> (Figure 7A). We complemented these loss-  
 281 of-function experiments with a gain-of-function approach designed to determine whether  
 282 mitochondrial localization of hexokinase was sufficient for low pH-induced MondoA  
 283 transcriptional activity. To accomplish this goal, we artificially tethered HK2 to the mitochondria.  
 284 We achieved this by fusing VDAC1 to the first 10  $\beta$ -strands of GFP (mVDAC1-GFP(1-10)) and  
 285 by fusing HK2 to the last  $\beta$ -strand of GFP (HK2-GFP(11)). When co-expressed, the  $\beta$ -strands of  
 286 GFP self-assemble (Kamiyama et al., 2016), linking mVDAC1 and HK2 (Figure 7B). Expression  
 287 of mVDAC1(E72Q)-GFP(1-10), which does not interact with HK2, blocked TXNIP induction

288 (Figure 7B-C). However, co-expression of mVDAC1(E72Q)-GFP(1-10) and HK2-GFP(11)  
289 rescued HK2 mitochondrial localization and TXNIP induction (Figure 7B-C). Together these data  
290 show that mitochondrial-localized HK2 is both necessary and sufficient for acidosis-driven  
291 MondoA activity.

292 Finally, we determined the effects of acidosis-driven mtATP and G6P synthesis on  
293 MondoA nuclear localization. While the majority of MondoA resides in the cytosol (Figure 7D),  
294 DMEM<sup>Acidic</sup> treatment drove an increase in MondoA nuclear localization in cells treated with an  
295 siRNA control (Figure 7D); however, MondoA nuclear accumulation was blunted in cells treated  
296 with siRNA pools against ATP5I, ANT2 and HK2 (Figure 7D). These finding demonstrate that  
297 mtATP and G6P synthesis are required for MondoA to accumulate in the nucleus in response to  
298 low pH (Figure 8).

299

## 300 **DISCUSSION**

301 Previous studies established that MondoA's transcriptional activity is highly-dependent on  
302 two signals: glucose and a signal from the ETC. By dissecting how low pH drives MondoA  
303 transcriptional activity, we establish here that the ETC signal is mtATP. Previous studies showed  
304 that a functional ETC is required for basal TXNIP expression, thus we propose that mtATP is a  
305 general requirement for MondoA transcriptional activity. Via the activity of OMM-bound HK2,  
306 mtATP couples to cytoplasmic glucose to generate G6P, which drives the nuclear accumulation  
307 and transcriptional activity of MondoA:MLx complexes (Figure 8). Further, we previously  
308 demonstrated (Sans et al., 2006), and confirmed here (Figure 4A), that MondoA and MLx also  
309 interact with the OMM. Therefore, we propose that MondoA:MLx and HK2 constitute a sensing  
310 and response module that integrates signals from the cytoplasm and the mitochondria to coordinate  
311 the transcriptional response to the cells two predominant energy sources. We studied how acidosis  
312 drives mtATP production and MondoA transcriptional activity. It will be interesting to determine  
313 whether other cellular signals that drive MondoA transcriptional activity also function by  
314 controlling mtATP pools.

315 By binding the mitochondria, hexokinase has increased specific activity and decreased  
316 feedback inhibition by G6P (Robey and Hay, 2006). By localizing to the mitochondria and sensing  
317 G6P derived from mitochondria-bound hexokinase, we propose that MondoA activity is coupled  
318 to mitochondrial hexokinase activity and mtATP synthesis. Given the OMM localization of  
319 MondoA, MLx and HK2, we suggest that the OMM serves as a scaffold for nutrient sensing by

320 MondoA, akin to other nutrient sensors that  
321 are tethered to organellar membranes, e.g. the  
322 mTORC1 complex is tethered to the lysosome  
323 where it integrates intra-lysosomal nutrient  
324 levels and cytosolic growth factor signals to  
325 control biosynthesis (Wolfson and Sabatini,  
326 2017), and the SREBP/Scap complex which is  
327 resident in the ER membrane where it  
328 monitors cholesterol and oxysterol availability  
329 and controls a transcriptional response to low  
330 sterol levels (Moon, 2017).

331 Our data suggest that MondoA  
332 functions as a coincidence detector which  
333 simultaneously senses mtATP and glucose  
334 through the synthesis of G6P (Figure 8). Such  
335 a model ensures that the availability of glucose

336 is tightly linked to mitochondrial activity and ATP synthesis. Conceptually, by coupling mtATP  
337 and cytosolic glucose, MondoA functions as a sensor of high cellular energy charge and via its  
338 transcriptional regulation of TXNIP, and potentially other targets, restricts glucose uptake and  
339 aerobic glycolysis to restore energy balance. Further, high TXNIP levels are correlated with  
340 oxidation of triglycerides, branched chain amino acids and lactate (DeBalsi et al., 2014, Bodnar et  
341 al., 2002), suggesting an additional role for the MondoA/TXNIP axis in driving utilization of non-  
342 glucose fuels when cellular energy charge is high. The precise mechanistic details of how MondoA  
343 senses G6P and the impact on cell metabolism remains to be clarified; however, the current data  
344 is most consistent with a direct allosteric model where G6P binds MondoA directly (McFerrin and  
345 Atchley, 2012, Peterson et al., 2010, Li et al., 2010).

346 Changes in intracellular pH have dramatic effects on cell function: generally acidic pH is  
347 anti-proliferative whereas alkaline pH is pro-proliferative. Acidic intercellular pH is correlated  
348 with an inhibition of aerobic glycolysis and a blockage of glucose uptake (Webb et al., 2011). Our  
349 data suggest that TXNIP induction contributes to this suppression of glucose metabolism driven  
350 by acidic pH. Further, an acidosis-dependent gene signature, of which TXNIP is a member  
351 correlates with better clinical outcomes in breast cancer (Chen et al., 2010, Chen et al., 2008).

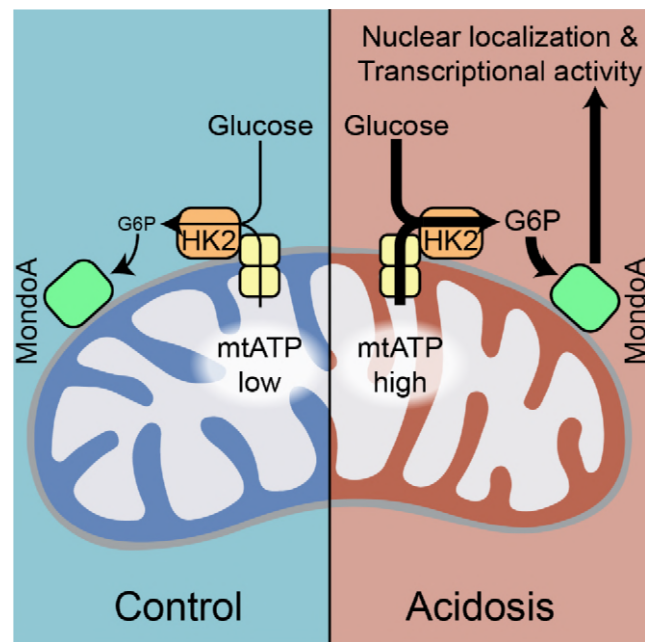

**Figure 8. Model.** Schematic depicting how acidosis drives MondoA transcriptional activity through the generation of mitochondrial ATP and utilization by mitochondria-bound hexokinase to produce G6P, which drives MondoA nuclear localization and transcriptional activity.



352 Interestingly, Otto Warburg noted that increased sodium bicarbonate and alkaline pH favor  
353 glycolysis (Koppenol et al., 2011, Warburg, 1925). Intracellular alkalization is now a widely  
354 accepted hallmark of cancer metabolism (Webb et al., 2011), that has pleiotropic effects on  
355 tumorigenesis, the most predominant being a transition from oxidative metabolism to aerobic  
356 glycolysis (Reshkin et al., 2000). Because, MondoA transcriptional activity at the TXNIP promoter  
357 is suppressed by high sodium bicarbonate and alkaline pH (Figure 2 – figure supplement 1C), we  
358 propose that TXNIP down regulation contributes to the shift to high glucose uptake driven by  
359 alkaline pH. It will be important to determine whether alkaline pH suppresses mitochondrial  
360 function and restrict mtATP production. Collectively, our data suggest that MondoA/TXNIP axis  
361 plays a critical role in how cancer cells sense and respond to dysregulated pH.

362 Our gene expression data demonstrates that MondoA is essential for the regulation of 37%  
363 of an acidosis-driven transcriptional response. Among the MondoA-dependent genes are fatty acid  
364 and mitochondrial metabolism genes. Given that these pathways are enhanced by acidosis (Corbet  
365 et al., 2016, Lamonte et al., 2013, Khacho et al., 2014), we propose that MondoA plays a critical  
366 role in an adaptive metabolic response to acidosis. Most genes were only partially dependent on  
367 MondoA; however, TXNIP and ARRDC4 were entirely dependent on MondoA, suggesting that  
368 TXNIP and ARRDC4 are direct MondoA targets whereas the other targets may be regulated by  
369 indirect mechanisms. Consistent with this finding, MondoA is enriched on the promoters of  
370 TXNIP and ARRDC4 in MDA-MB-231 cells, but not on the promoters of the other acidosis-  
371 regulated genes identified here (data not shown).

372 Finally, it is well established that oncogenes drive a shift from oxidative metabolism to  
373 aerobic glycolysis (Pavlova and Thompson, 2016). The resulting shift away from ATP synthesis  
374 in the mitochondria to ATP synthesized by glycolysis in the cytosol would be predicted to restrict  
375 MondoA-dependent activation of TXNIP expression and reinforce glucose uptake and aerobic  
376 glycolysis. Strikingly, TXNIP expression is also downregulated by a variety of pro-growth signals  
377 such as mTOR, PI3K, Ras and Myc (Elgort et al., 2010, Kaadige et al., 2015, Shen et al., 2015),  
378 which results in increased glucose uptake. Together these two findings place MondoA and its  
379 regulation of TXNIP both upstream and downstream of metabolic reprogramming towards aerobic  
380 glycolysis.

381

## 382 **MATERIALS AND METHODS**

383

384 **Key Resources Table**

| <b>Reagent type (species) or resource</b>                                                    | <b>Designation</b> | <b>Source or reference</b>            | <b>Identifiers</b> | <b>Additional information</b> |
|----------------------------------------------------------------------------------------------|--------------------|---------------------------------------|--------------------|-------------------------------|
| Anti-HK2 (anti-HXKII)                                                                        |                    | Santa Cruz                            | sc6521             |                               |
| Anti-MLX (D8G6W)                                                                             |                    | Cell Signaling                        | 85570S             |                               |
| Anti-MondoA (Anti-MLXIP)                                                                     |                    | Proteintech                           | 13614-1-AP         |                               |
| Anti-SDHA (2E3GC12FB2AE2)                                                                    |                    | Abcam                                 | AB147              |                               |
| Anti-Tubulin                                                                                 |                    | Molecular Probes                      | 236-10501          |                               |
| Anti-TXNIP                                                                                   |                    | Abcam                                 | ab188865           |                               |
| Anti-LaminB1                                                                                 |                    | Abcam                                 | ab16048            |                               |
| Donkey anti-goat IgG-HRP                                                                     |                    | Santa Cruz                            | sc-2056            |                               |
| Mouse IgG, HRP-linked whole Ab (from sheep)                                                  |                    | GE Life Science                       | NA-931             |                               |
| Rabbit IgG, HRP-linked whole Ab (from donkey)                                                |                    | GE Life Science                       | NA-934             |                               |
| BCECF-AM                                                                                     |                    | Thermo Fisher                         | B1170              |                               |
| Blotting Grade Blocker Non-fat Dry Milk                                                      |                    | Bio-Rad                               | 1706404XTU         |                               |
| CCCP                                                                                         |                    | Sigma Aldrich                         | C2759              |                               |
| Chloroquine                                                                                  |                    | Sigma Aldrich                         | 415480             |                               |
| Deoxy-D-Glucose, 2-[1,2-3H(N)]                                                               |                    | American Radiolabeled Chemicals, Inc. | 0103-250           |                               |
| DMEM                                                                                         |                    | Gibco                                 | 11995-065          |                               |
| DMEM Powder without sodium bicarbonate, glucose, L-glutamine, sodium pyruvate and phenol red |                    | Cellgro                               | 90-113-PB          |                               |
| DMSO                                                                                         |                    | Fisher                                | BP231              |                               |
| FCCP                                                                                         |                    | Sigma Aldrich                         | C2920              |                               |
| Fetal bovine serum (FBS)                                                                     |                    | Gibco                                 | 26140-079          |                               |
| Galacto-Light™ Reaction Buffer Diluent with Galacton-Plus™                                   |                    | Thermo Fisher                         | T1055              |                               |
| Glucose                                                                                      |                    | Fisher                                | D16-1              |                               |
| Glutamine                                                                                    |                    | Cellgro                               | 25-005-CI          |                               |

|                                                     |  |                         |           |  |
|-----------------------------------------------------|--|-------------------------|-----------|--|
| HBSS                                                |  | Gibco                   | 24020-117 |  |
| HEPES                                               |  | Sigma Aldrich           | H3375     |  |
| JC1                                                 |  | Thermo Fisher           | T3168     |  |
| Luciferase Assay System                             |  | Promega                 | E4550     |  |
| Metformin                                           |  | Sigma Aldrich           | D150959   |  |
| Monensin                                            |  | Sigma Aldrich           | M5273     |  |
| Non-essential amino acids                           |  | Gibco                   | 11140-050 |  |
| Oligomycin A                                        |  | Sigma Aldrich           | 75351     |  |
| Penicillin/Streptomycin                             |  | Gibco                   | 15140-112 |  |
| Phenol Red                                          |  | Sigma Aldrich           | P-0290    |  |
| ProSignal Pico ECL                                  |  | Genesee Scientific      | 20-300B   |  |
| Reporter 5X Lysis Buffer                            |  | Promega                 | E4030     |  |
| Sodium bicarbonate                                  |  | Fisher                  | L-23200   |  |
| Sodium pyruvate                                     |  | Gibco                   | 11360-070 |  |
| SuperSignal West Femto                              |  | Thermo Fisher           | 34094     |  |
| Trypsin-EDTA (0.25%)                                |  | Gibco                   | 25200-056 |  |
| Tween-20                                            |  | Fisher                  | BP-337    |  |
| Critical Commercial Assays                          |  |                         |           |  |
| Quick RNA miniprep kit                              |  | Genesee Scientific      | R1055     |  |
| ATP determination kit                               |  | Thermo Fisher           | A22066    |  |
| Mitochondria isolation kit for cultured cells       |  | Thermo Fisher           | 89874     |  |
| Stranded mRNA-Seq kit with mRNA capture beads       |  | Kapa Biosystems         | KK8421    |  |
| MondoA <sup>+/+</sup> mouse embryonic fibroblasts   |  | Peterson et al. 2008    | N/A       |  |
| MondoA <sup>ΔΔ</sup> mouse embryonic fibroblasts    |  | Peterson et al. 2008    | N/A       |  |
| 143B                                                |  | Weinberg et al. 2010    | N/A       |  |
| 143B $\rho^0$                                       |  | Weinberg et al. 2010    | N/A       |  |
| 143B $\rho^0$ : Wild type cybrid                    |  | Weinberg et al. 2010    | N/A       |  |
| 143B $\rho^0$ : $\Delta$ ATP6/ $\Delta$ ATP8 cybrid |  | Boominathan et al. 2016 | N/A       |  |

|                                                                                          |  |                         |          |  |
|------------------------------------------------------------------------------------------|--|-------------------------|----------|--|
| 143Bp <sup>0</sup> :ΔATP6/ΔATP<br>8 cybrid + ATP6 <sub>nuc</sub><br>+ATP8 <sub>nuc</sub> |  | Boominathan et al. 2016 | N/A      |  |
| HeLa                                                                                     |  | ATCC                    | CCL-2    |  |
| BJ-Tert                                                                                  |  | ATCC                    | CRL-4001 |  |
| TXNIP_forwad<br>(human):<br>TGACTTTGGCCTAC<br>AGTGGG                                     |  | Peterson et al. 2010    | N/A      |  |
| TXNIP_reverse<br>(human):<br>TTGCGCTTCTCCAG<br>ATACTGC                                   |  | Peterson et al. 2010    | N/A      |  |
| TXNIP_forward<br>(mouse):<br>CCTGACCTAATGGC<br>ACC                                       |  | Peterson et al. 2010    | N/A      |  |
| TXNIP_reverse<br>(mouse):<br>GAGATGTCATCACC<br>TTCAC                                     |  | Peterson et al. 2010    | N/A      |  |
| ATP5I_forward:<br>CAGGTCTCTCCGCT<br>CATCAAG                                              |  | This paper              | N/A      |  |
| ATP5I_reverse:<br>GCCCGAGGTTTTAG<br>GTAATTGT                                             |  | This paper              | N/A      |  |
| Actin_forward:<br>TCCATCATGAAGTG<br>TGACGT                                               |  | Peterson et al. 2010    | N/A      |  |
| Actin_reverse:<br>TACTCCTGCTTGCT<br>GATCCAC                                              |  | Peterson et al. 2010    | N/A      |  |
| LXSH                                                                                     |  | Stoltzman et al. 2008   | N/A      |  |
| LXSH-MondoA                                                                              |  | Stoltzman et al. 2008   | N/A      |  |
| LXSH-<br>MondoA(I766P)                                                                   |  | Stoltzman et al. 2008   | N/A      |  |
| pcDNA3-AT1.03<br>(ATEAM)                                                                 |  | Imamura et al. 2009     | N/A      |  |
| pcDNA3-mitAT1.03<br>(Mit-ATEAM)                                                          |  | Imamura et al. 2009     | N/A      |  |
| pcDNA3-AT1.03<br>R122K/R126K                                                             |  | Imamura et al. 2009     | N/A      |  |
| pcDNA3-mitAT1.03<br>R122K/R126K                                                          |  | Imamura et al. 2009     | N/A      |  |

|                                                  |  |                       |                  |  |
|--------------------------------------------------|--|-----------------------|------------------|--|
| pEGFP-N1-mVDAC1                                  |  | Zaid et a. 2005       | N/A              |  |
| pEGFP-N1-mVDAC1(E72Q)                            |  | Zaid et a. 2005       | N/A              |  |
| pCDV-SPORT6-HK2                                  |  | Stoltzman et al. 2008 | N/A              |  |
| pCDV-SPORT6-HK2(D657A)                           |  | Stoltzman et al. 2008 | N/A              |  |
| pcDNA3.1-mVDAC1-GFP(1-10)                        |  | This paper            | N/A              |  |
| pcDNA3.1-mVDAC1(E72Q)-GFP(1-10)                  |  | This paper            | N/A              |  |
| pcDNA3.1-HK2-GFP(11)                             |  | This paper            | N/A              |  |
| pGL3Basic-TXNIP_Promoter                         |  | Peterson et al. 2010  | N/A              |  |
| pGL3Basic-TXNIP_Promoter(Cho RE <sub>mut</sub> ) |  | Peterson et al. 2010  | N/A              |  |
| Prism                                            |  | Graphpad Software     | N/A              |  |
| ImageJ                                           |  | N/A                   | N/A              |  |
| CFX Manager 3.1                                  |  | Bio-Rad               | N/A              |  |
| R                                                |  | N/A                   | N/A              |  |
| javaGSEA                                         |  | Broad Institute       | N/A              |  |
| Cytoscape 3.6.1                                  |  | N/A                   | N/A              |  |
| NIS Elements                                     |  | Nikon                 | N/A              |  |
| siRNA: Dharmacon ON-TARGETplus control siRNA     |  | GE Life Sciences      | D00-1810-10-20   |  |
| siRNA: siATP5I SmartPool                         |  | GE Life Sciences      | M-019688-01      |  |
| siRNA: siSLC25A5 SmartPool (siANT2)              |  | GE Life Sciences      | M-007486         |  |
| siRNA: siHK2 SmartPool                           |  | GE Life Sciences      | L-006735-00-0005 |  |
| Nunc™ Lab-Tek™ II Chambered Coverglass, 8-well   |  | Thermo Fisher         | 155409PK         |  |
| 3.5 mm glass bottom culture dishes               |  | MatTek Corporation    | P35G-.15-14-C    |  |
| Hybond P PVDF Membrane; 0.45 μm                  |  | Genesee Scientific    | 83-646R          |  |
| 2 ml PTFE tissue grinder                         |  | VWR                   | 89026-398        |  |

|                                      |  |           |           |  |
|--------------------------------------|--|-----------|-----------|--|
| Bioruptor® Plus<br>sonication devise |  | Diagenode | B01020001 |  |
|--------------------------------------|--|-----------|-----------|--|

385

### 386 **Cell lines**

387 A list of cell lines used is provided in the Key Resources Table. All cells were maintained in  
388 DMEM +10% FBS (Gibco), 100 units/mL penicillin (Gibco) and 100 units/mL streptomycin  
389 (Gibco). 143Bp<sup>0</sup> and cybrids were cultured with 1 mM sodium pyruvate and 50 µg/mL uridine.  
390 Cells were passaged and treated in an incubator set at 37 °C and 5% CO<sub>2</sub>.

391

392 HeLa:MondoA-KO cells were generated by expressing CRISPR/Cas9, three sgRNAs (GeCKO  
393 library 2.0) and a homology-directed repair (HDR) construct containing a puromycin-resistance  
394 cassette (Santa Cruz Biotechnology). HDR incorporation into the genome was determined by  
395 selecting for cells resistant to 2.5 µg/mL puromycin. Loss of MondoA was determined by  
396 immunoblotting.

397

### 398 **Treatments**

399 HBSS was supplemented with glucose to 20 mM prior to treatment. Low pH treatment media (pH  
400 6.5) was prepared from DMEM powder without glutamine, glucose, pyruvate, sodium bicarbonate  
401 and phenol red (DMEM<sup>Acidic</sup>). The following were added: glutamine to 2 mM, glucose to 20 mM,  
402 pyruvate 1 mM, sodium bicarbonate to 0.35 g/L and phenol red to 16 mg/L. For live cell imaging,  
403 phenol red was omitted.

404

### 405 **Plasmid construction**

406 Plasmids were created using either standard restriction digest and ligation or Gibson assembly  
407 (NEB). A list of plasmids used, the vector backbone and their source is provided in the Key  
408 Resources Table.

409

### 410 **Quantitative PCR**

411 Total cellular RNA was extracted using a Quick RNA Miniprep Kit (Zymo Research) according  
412 to manufacturer's recommendations. cDNA was synthesized from 200 ng mRNA using the  
413 GoScript Reverse Transcription System (Promega) with oligo-dT primers. A 100-fold dilution was  
414 used in a PCR reaction containing SYBR Green and analyzed on a CFX Connect Real Time



415 System. Values were determined using a standard curve. For each sample, three technical  
416 replicates were performed and averages determined.

417

### 418 **Immunoblotting**

419 Equal concentrations of denatured protein lysates were resolved on 10% SDS-PAGE gel with a  
420 stacking gel. Proteins were electrotransferred to PDVF membrane (Genesee Scientific).  
421 Membranes were incubated in 5% (weight/volume) blotting-grade non-fat dry milk (Bio-Rad) in  
422 TBST (Tris-buffered saline, pH 7.4 and 0.1% Tween-20) for 30 minutes at room temperature with  
423 gentle rocking. Membranes were then transferred to antibody-dilution buffer (20 mM Tris, pH 8.0;  
424 200 mM NaCl; 0.25% Tween-20; 2% bovine serum albumin; 0.1% sodium azide) and incubated  
425 for one hour at room temperature or overnight at 4 °C with gentle rocking. Membranes were  
426 washed with TBST and vigorous rocking at room temperature. Membranes were then incubated  
427 in secondary antibody diluted in 5% (weight/volume) blotting-grade non-fat dry milk (Bio-Rad)  
428 in TBST for one hour at room temperature with gentle rocking. Membranes were then washed  
429 again and proteins were detected with chemiluminescence using standard or high sensitivity ECL  
430 (Genesee Scientific or Thermo Fisher, respectively). Antibodies were used at the following  
431 dilutions: Anti-GFP 1:1000; Anti-HK2 1:1,000; Anti-Mlx 1:1,000; Anti-MondoA 1:2,000; Anti-  
432 SDHA 1:15,000; Anti-Tubulin 1:50,000; Anti-TXNIP 1:2,000; Anti-goat HRP 1:20,000; Anti-  
433 mouse HRP 1:5,000 and Anti-rabbit HRP 1:15,000.

434

### 435 **ATP quantification**

436 After treatment, cells were washed once with cold PBS. Cells were scraped into boiling TE buffer  
437 (1 mL per 3.5 cm dish), which was collected into 1.5 mL centrifuge tube. Cells were then boiled  
438 for 5 min. Lysates were cleared by centrifugation at 20,000xg for 5 minutes. The ATP  
439 determination kit (Thermo Fisher) was used with 10 µL of supernatant. A standard curve was  
440 generated using purified ATP.

441

### 442 **Live cell imaging (mtATP determination): Widefield microscopy**

443 Widefield microscopy was used for Figure 5 and Figure 5 – figure supplement 1. Cells were plated  
444 on 3.5 mm glass bottom culture dishes (MatTek Corporation). The following day 100 ng Mit-  
445 ATEAM was transfected using Lipofectamine 3000 (Thermo Fisher) according to manufacturer's  
446 recommendations. The next day cells were treated with DMEM<sup>Acidic</sup> lacking phenol red. Real time

447 live imaging was conducted for 8 hours using a Nikon A1R with a 40X lens. For each time point  
448 images were captured using 488/525 (YFP), 405/480 (CFP), and 405/525 (FRET)  
449 excitement/emission (nm).

450  
451 Images were analyzed using ImageJ. We used the YFP channel to identify and isolate  
452 mitochondrial regions for each image. We isolated these same regions from the CFP and FRET  
453 channel. Total intensity was determined for each image. FRET/CFP ratios were determined and  
454 normalized to the 2-hour time point. RatioPlus was used to make pseudo-colored images.

455  
456 **Live cell imaging (mtATP determination): Confocal microscopy**

457 Confocal microscopy was used for Figure 5 – figure supplement 1. Cells were plated on 8-well  
458 Nunc™ Lab-Tek™ II Chambered Coverglass (Thermo Fisher). The following day 200 ng DNA  
459 was transfected using Lipofectamine 3000 (Thermo Fisher) according to manufacturer's  
460 recommendations. The next day cells were treated DMEM<sup>Acidic</sup> lacking phenol red or DMEM  
461 lacking phenol red with CCCP. Real time live imaging was conducted for 8 hours using a Nikon  
462 A1 with a 20X lens. For each time point images were captured using 402/488 (CFP) and 402/525  
463 (FRET) excitement/emission (nm). Images were analyzed using ImageJ. RatioPlus was used to  
464 make pseudo-colored images. Total intensity for each image was determined.

465  
466 **Glucose uptake**

467 Cells were incubated with deoxy-D-glucose-2[1,2-3H(N)] (American Radiolabeled Chemicals,  
468 Inc.) in Krebs-Ringer-HEPES buffer (NaCl, 116 mM; KCl, 4 mM; MgCl<sub>2</sub>, 1 mM; CaCl<sub>2</sub>, 1.8 mM;  
469 2-deoxy-D-glucose, 20 mM; HEPES pH 7.4, 10 mM) for 10 minutes. Cells were then washed,  
470 harvested and analyzed for radioactivity using a scintillation counter. A standard was used to  
471 determine the exact molar content in each sample. deoxy-D-glucose-2[1,2-3H(N)] was normalized  
472 to protein content as determined by a Bradford Protein Assay (Bio-Rad).

473  
474 **Mitochondrial membrane potential**

475 Cells were plated on 8-well Nunc™ Lab-Tek™ II Chambered Coverglass (Thermo Fisher). 45  
476 minutes prior to experiment, cells were loaded with JC1 (1 µg/mL). Cells were treated DMEM<sup>Acidic</sup>  
477 lacking phenol red or DMEM lacking phenol red. A Nikon A1 confocal and NIS Elements AR  
478 were used to capture images. For each time point images were captured by exciting with 488 nm

479 light and reading the emission at 530 nm (green) and 595 nm (red). The ratio of red to green was  
480 used to quantify changes in membrane potential one hour after acidosis treatment.

481

### 482 **Intracellular pH**

483 Cells were plated on 3.5 mm glass bottom culture dishes (MatTek Corporation). The next day cells  
484 were treated with normal or low pH DMEM for 4 hours. Cells were treated with BCECF-AM (1  
485  $\mu\text{M}$ ) 30 minutes prior to the end of the experiment. A standard curve was generated by treating  
486 cells with media of varying pHs and Nigericin (5  $\mu\text{M}$ ), which equilibrates intracellular and  
487 extracellular pH. A Nikon A1 confocal and NIS Elements AR were used to capture images by  
488 exciting with 488 nm and reading emission at 530 nm and 595 nm. The 595/530 nm fluorescence  
489 emission ratio was used to generate a calibration curve and determine intracellular pH for acidosis-  
490 treated cells.

491

### 492 **Mitochondria purification**

493 Mitochondria were purified from  $\sim 20 \times 10^6$  cells using a Mitochondria Isolation Kit for Cultured  
494 Cells (Thermo Fisher). Cells were processed using a PTFE tissue grinder (VWR). Following  
495 purification, mitochondria were resuspended in 100  $\mu\text{l}$  radioimmunoprecipitation (RIPA) buffer.  
496 100  $\mu\text{l}$  of both mitochondria and cytosolic fractions were sonicated at using a Bioruptor sonication  
497 device (Diagenode). Sonication was performed  $4^\circ\text{C}$  using 30 second on/off pulses at the high  
498 setting. Following sonication, lysates were centrifuged and supernatants were collected and  
499 analyzed for protein content using a Bradford Protein Assay (Bio-Rad). 1-5  $\mu\text{g}$  of sample were  
500 used for immunoblot analysis.

501

### 502 **Subcellular Fractionation: Nuclei and cytoplasm**

503 Three days prior to fractionation siRNAs were transfected using Lipofectamine 3000 (Thermo  
504 Fischer). Cells were washed with cold PBS and dislodged from plate by scraping. Cells were  
505 pelleted by centrifugation and resuspended in 1 mL of fractionation buffer (40 mM HEPES pH  
506 7.9, 137 mM NaCl, 2.7 mM KCl, 1.5 mM  $\text{MgCl}_2$ , 0.34 M sucrose, 10% glycerol, 1 mM DTT,  
507 0.5% NP40, protease and phosphatase inhibitors). Cells were incubated on ice for 10 minutes then  
508 pelleted by centrifugation at 1000 rcf for 5 minutes. The supernatant was kept (cytoplasm) and the  
509 pellet (nuclei) was washed three times with 0.5 mL fractionation buffer.

510

### 511 **Luciferase Assay**

512 Cells were seeded and the next day transfected with constructs containing a 1518-bp fragment of  
513 the TXNIP promoter (or a mutant)-driven luciferase and CMV-driven beta-galactosidase (Kadige  
514 et al., 2009). Cells were harvested in 1X Buffer RLB (Promega). Luciferase was detected using  
515 the Luciferase Detection System (Promega) and beta-galactosidase was detected using Galacto-  
516 Light™ Reaction Buffer Diluent with Galacto-Plus™ Substrate (Thermo Fisher). Luminescence  
517 was determined using a GloMax 96 Microplate Luminometer (Promega). Luciferase values were  
518 normalized to beta-galactosidase.

519

### 520 **GC-MS**

521 Following treatment, cells were collected into a 1.5 mL microcentrifuge tube then snap frozen  
522 using liquid nitrogen. Cells were kept at -80°C until metabolite extraction was performed. 450 µL  
523 of cold 90% methanol and internal standards were added to cells and incubated at -20°C for 1 hour.  
524 Tubes were then centrifuged at -20,000×g for 5 minutes at 4°C. Supernatants were dried using a  
525 speed-vac.

526

527 Samples were converted into volatile derivatives amenable to GC-MS. Briefly, dried samples were  
528 resuspended in O-methoxylamine hydrochloride (40 mg/mL) then mixed with 40 µL N-methyl-  
529 N-trimethylsilyltrifluoroacetamide and mixed at 37°C. After incubation, 3 µL fatty acid methyl ester  
530 standard solution was added. 1 µL of this final solution was injected into gas chromatograph with  
531 an inlet temperature of 250°C. A 10:1 split ratio was used. Three temperatures were ramped with  
532 a final temperature of 350°C and a final 3-minute incubation. A 30 m Phenomex ZB5-5 MSi  
533 column was used. Helium was used as carrier gas at 1 mL/minute. Samples were analyzed again  
534 with a 10-fold dilution.

535

536 Data was collected using MassLynx 4.1 software (Waters). Metabolites were identified and peak  
537 area was determined using QuanLynx. Data was normalized using Metaboanalyst 3.6  
538 (<http://www.metaboanalyst.ca/>). Quantile normalization, log transformation and Pareto scaling  
539 were used. Normal distribution of values was used to determine fold changes.

540

## 541 **RNA-sequencing library construction and analysis**

542 Total RNA was extracted from cells using a Quick RNA Miniprep Kit (Zymo Research) according  
543 to manufacturer's recommendations. mRNA was isolated and library production performed using  
544 a Stranded mRNA-Seq Kit with mRNA Capture Beads (Kapa). Library quality was analyzed using  
545 an Agilent High Sensitivity D1000 ScreenTape. Single-end sequencing for 50 cycles was  
546 performed using an Illumina HiSeq. The resulting FASTQ files were aligned to the human genome  
547 (hg38) using STAR. DESeq2 was used to quantify transcript abundance, differential expression,  
548 FPKM values, and interaction terms (genotype:treatment combinatorial statistic).

549  
550 Overrepresentation analysis performed using ConsensusPathDB. Pathway-based sets were  
551 analyzed from Wikipathways. A p-value cutoff of 0.01 and a minimum overlap of 2 genes was  
552 used. Enriched pathways were verified by comparing fold-changes obtained from DESeq2.

553  
554 Gene set enrichment analysis and leading edge analysis (Broad Institute) was conducted using  
555 FPKM values and all gene sets from in the Molecular Signature Database. Leading edge analysis  
556 was visualized using the Cytoscape (p-value  $\leq 0.001$  and overlap coefficient  $\geq 0.5$ ).

557  
558 **Gene signature**

559 mRNA expression z-scores were obtained for 2509 breast cancer tumors (Pereira et al., 2016).  
560 Acidosis regulated genes were determined from the gene set GO\_RESPONSE\_TO\_ACIDIC\_PH  
561 in the Molecular Signature Database. Principal component analysis was conducted for all tumors  
562 using the expression levels of acidosis regulated genes. Gene signature scores were determined as  
563 the first principle component. This was compared to TXNIP expression for the same tumors.

564  
565 The normalized expression ( $\log_2(\text{normalized-counts} + 1)$ ) of TXNIP, SLC16A3 (MCT4),  
566 SLC16A1 (MCT1) and SLC9A1 (NHE1) was determined using the UCSC Xena browser.  
567 Spearman and Pearson coefficients were used to correlate gene expression. The following datasets  
568 were used: TCGA-BRCA, TCGA-LUNG, TCGA-GBM, GTEx-muscle and GTEx-skin.

569  
570 **Quantification and statistical analysis**

571 Data is presented as mean  $\pm$  standard deviation. One-way ANOVA was used to account for  
572 variation and significance was determined using a two-tailed Student's t-test. Unless otherwise  
573 indicated, at least three biological replicates were used for each analysis.

574

## 575 **ACKNOWLEDGEMENTS**

576 We thank members of the Ayer Lab and Mahesh B. Chandrasekharan for helpful discussions and  
577 comments on this manuscript. We also thank Hiroyuki Noji (University of Tokyo), Varda  
578 Shoshan-Barmatz (Ben-Gurion University of Negev), Matthew S. O'Connor (SENS Research  
579 Foundation Research Center), and Jared Rutter (University of Utah) for reagents and advice.  
580 D.E.A. was supported by National Institutes of Health Grants 5RO1GM055668 and  
581 1R01CA222650-01A1, by developmental funds from the Huntsman Cancer Foundation, and by  
582 Department of Defense Grant W81XWH1410445.

583

## 584 **REFERENCES**

- 585 ABU-HAMAD, S., ZAID, H., ISRAELSON, A., NAHON, E. & SHOSHAN-BARMATZ, V.  
586 2008. Hexokinase-I protection against apoptotic cell death is mediated via interaction with  
587 the voltage-dependent anion channel-1: mapping the site of binding. *J Biol Chem*, 283,  
588 13482-90.
- 589 ABU-REMAILEH, M., WYANT, G. A., KIM, C., LAQTOM, N. N., ABBASI, M., CHAN, S. H.,  
590 FREINKMAN, E. & SABATINI, D. M. 2017. Lysosomal metabolomics reveals V-  
591 ATPase- and mTOR-dependent regulation of amino acid efflux from lysosomes. *Science*,  
592 358, 807-813.
- 593 ADAMS, D. J., WAHL, M. L., FLOWERS, J. L., SEN, B., COLVIN, M., DEWHIRST, M. W.,  
594 MANIKUMAR, G. & WANI, M. C. 2006. Camptothecin analogs with enhanced activity  
595 against human breast cancer cells. II. Impact of the tumor pH gradient. *Cancer Chemother*  
596 *Pharmacol*, 57, 145-54.
- 597 ANDERSON, E. J. 2016. Cutting Calories and TXNIP From the Skeletal Muscle to Restore Insulin  
598 Sensitivity. *Diabetes*, 65, 16-8.
- 599 ARORA, K. K., FILBURN, C. R. & PEDERSEN, P. L. 1991. Glucose phosphorylation. Site-  
600 directed mutations which impair the catalytic function of hexokinase. *J Biol Chem*, 266,  
601 5359-62.



- 602 BILLIN, A. N., EILERS, A. L., COULTER, K. L., LOGAN, J. S. & AYER, D. E. 2000. MondoA,  
603 a novel basic helix-loop-helix-leucine zipper transcriptional activator that constitutes a  
604 positive branch of a max-like network. *Mol Cell Biol*, 20, 8845-54.
- 605 BODNAR, J. S., CHATTERJEE, A., CASTELLANI, L. W., ROSS, D. A., OHMEN, J.,  
606 CAVALCOLI, J., WU, C., DAINS, K. M., CATANESE, J., CHU, M., SHETH, S. S.,  
607 CHARUGUNDLA, K., DEMANT, P., WEST, D. B., DE JONG, P. & LUSIS, A. J. 2002.  
608 Positional cloning of the combined hyperlipidemia gene Hyplip1. *Nat Genet*, 30, 110-6.
- 609 BOOMINATHAN, A., VANHOOZER, S., BASISTY, N., POWERS, K., CRAMPTON, A. L.,  
610 WANG, X., FRIEDRICKS, N., SCHILLING, B., BRAND, M. D. & O'CONNOR, M. S.  
611 2016. Stable nuclear expression of ATP8 and ATP6 genes rescues a mtDNA Complex V  
612 null mutant. *Nucleic Acids Res*, 44, 9342-9357.
- 613 CHEN, J. L., LUCAS, J. E., SCHROEDER, T., MORI, S., WU, J., NEVINS, J., DEWHIRST, M.,  
614 WEST, M. & CHI, J. T. 2008. The genomic analysis of lactic acidosis and acidosis  
615 response in human cancers. *PLoS Genet*, 4, e1000293.
- 616 CHEN, J. L., MERL, D., PETERSON, C. W., WU, J., LIU, P. Y., YIN, H., MUOIO, D. M., AYER,  
617 D. E., WEST, M. & CHI, J. T. 2010. Lactic acidosis triggers starvation response with  
618 paradoxical induction of TXNIP through MondoA. *PLoS Genet*, 6, e1001093.
- 619 CHEN, W. W., FREINKMAN, E., WANG, T., BIRSOY, K. & SABATINI, D. M. 2016. Absolute  
620 Quantification of Matrix Metabolites Reveals the Dynamics of Mitochondrial Metabolism.  
621 *Cell*, 166, 1324-1337 e11.
- 622 COOPER, G. M. 2000. *The Cell: A Molecular Approach*, Sunderland, MA, Sinauer Associates.
- 623 CORBET, C., PINTO, A., MARTHERUS, R., SANTIAGO DE JESUS, J. P., POLET, F. &  
624 FERON, O. 2016. Acidosis Drives the Reprogramming of Fatty Acid Metabolism in  
625 Cancer Cells through Changes in Mitochondrial and Histone Acetylation. *Cell Metab*, 24,  
626 311-23.
- 627 DEBALSI, K. L., WONG, K. E., KOVES, T. R., SLENTZ, D. H., SEILER, S. E., WITTMANN,  
628 A. H., ILKAYEVA, O. R., STEVENS, R. D., PERRY, C. G., LARK, D. S., HUI, S. T.,  
629 SZWEDA, L., NEUFER, P. D. & MUOIO, D. M. 2014. Targeted metabolomics connects  
630 thioredoxin-interacting protein (TXNIP) to mitochondrial fuel selection and regulation of  
631 specific oxidoreductase enzymes in skeletal muscle. *J Biol Chem*, 289, 8106-20.
- 632 DIETL, K., RENNER, K., DETTMER, K., TIMISCHL, B., EBERHART, K., DORN, C.,  
633 HELLERBRAND, C., KASTENBERGER, M., KUNZ-SCHUGHART, L. A., OEFNER,

- 634 P. J., ANDREESEN, R., GOTTFRIED, E. & KREUTZ, M. P. 2010. Lactic acid and  
635 acidification inhibit TNF secretion and glycolysis of human monocytes. *J Immunol*, 184,  
636 1200-9.
- 637 ELGORT, M. G., O'SHEA, J. M., JIANG, Y. & AYER, D. E. 2010. Transcriptional and  
638 Translational Downregulation of Thioredoxin Interacting Protein Is Required for  
639 Metabolic Reprogramming during G(1). *Genes Cancer*, 1, 893-907.
- 640 GUNNINK, S. M., KERK, S. A., KUIPER, B. D., ALABI, O. D., KUIPERS, D. P., PRAAMSMA,  
641 R. C., WROBEL, K. E. & LOUTERS, L. L. 2014. Alkaline pH activates the transport  
642 activity of GLUT1 in L929 fibroblast cells. *Biochimie*, 99, 189-94.
- 643 HAN, K. S. & AYER, D. E. 2013. MondoA senses adenine nucleotides: transcriptional induction  
644 of thioredoxin-interacting protein. *Biochem J*, 453, 209-18.
- 645 HAY, N. 2016. Reprogramming glucose metabolism in cancer: can it be exploited for cancer  
646 therapy? *Nat Rev Cancer*, 16, 635-49.
- 647 HUI, S. T., ANDRES, A. M., MILLER, A. K., SPANN, N. J., POTTER, D. W., POST, N. M.,  
648 CHEN, A. Z., SACHITHANANTHAM, S., JUNG, D. Y., KIM, J. K. & DAVIS, R. A.  
649 2008. Txnip balances metabolic and growth signaling via PTEN disulfide reduction. *Proc*  
650 *Natl Acad Sci U S A*, 105, 3921-6.
- 651 IMAMURA, H., NHAT, K. P., TOGAWA, H., SAITO, K., IINO, R., KATO-YAMADA, Y.,  
652 NAGAI, T. & NOJI, H. 2009. Visualization of ATP levels inside single living cells with  
653 fluorescence resonance energy transfer-based genetically encoded indicators. *Proc Natl*  
654 *Acad Sci U S A*, 106, 15651-6.
- 655 JONCKHEERE, A. I., HOGEVEEN, M., NIJTMANS, L. G., VAN DEN BRAND, M. A.,  
656 JANSSEN, A. J., DIEPSTRA, J. H., VAN DEN BRANDT, F. C., VAN DEN HEUVEL,  
657 L. P., HOL, F. A., HOFSTE, T. G., KAPUSTA, L., DILLMANN, U., SHAMDEEN, M.  
658 G., SMEITINK, J. A. & RODENBURG, R. J. 2008. A novel mitochondrial ATP8 gene  
659 mutation in a patient with apical hypertrophic cardiomyopathy and neuropathy. *J Med*  
660 *Genet*, 45, 129-33.
- 661 JUNN, E., HAN, S. H., IM, J. Y., YANG, Y., CHO, E. W., UM, H. D., KIM, D. K., LEE, K. W.,  
662 HAN, P. L., RHEE, S. G. & CHOI, I. 2000. Vitamin D3 up-regulated protein 1 mediates  
663 oxidative stress via suppressing the thioredoxin function. *J Immunol*, 164, 6287-95.

- 664 KAADIGE, M. R., LOOPER, R. E., KAMALANAADHAN, S. & AYER, D. E. 2009. Glutamine-  
665 dependent anapleurosis dictates glucose uptake and cell growth by regulating MondoA  
666 transcriptional activity. *Proc Natl Acad Sci U S A*, 106, 14878-83.
- 667 KAADIGE, M. R., YANG, J., WILDE, B. R. & AYER, D. E. 2015. MondoA-Mlx transcriptional  
668 activity is limited by mTOR-MondoA interaction. *Mol Cell Biol*, 35, 101-10.
- 669 KABASHIMA, T., KAWAGUCHI, T., WADZINSKI, B. E. & UYEDA, K. 2003. Xylulose 5-  
670 phosphate mediates glucose-induced lipogenesis by xylulose 5-phosphate-activated  
671 protein phosphatase in rat liver. *Proc Natl Acad Sci U S A*, 100, 5107-12.
- 672 KAMIYAMA, D., SEKINE, S., BARSIRHYNE, B., HU, J., CHEN, B., GILBERT, L. A.,  
673 ISHIKAWA, H., LEONETTI, M. D., MARSHALL, W. F., WEISSMAN, J. S. & HUANG,  
674 B. 2016. Versatile protein tagging in cells with split fluorescent protein. *Nat Commun*, 7,  
675 11046.
- 676 KHACHO, M., TARABAY, M., PATTEN, D., KHACHO, P., MACLAURIN, J. G.,  
677 GUADAGNO, J., BERGERON, R., CREGAN, S. P., HARPER, M. E., PARK, D. S. &  
678 SLACK, R. S. 2014. Acidosis overrides oxygen deprivation to maintain mitochondrial  
679 function and cell survival. *Nat Commun*, 5, 3550.
- 680 KING, M. P. & ATTARDI, G. 1989. Human cells lacking mtDNA: repopulation with exogenous  
681 mitochondria by complementation. *Science*, 246, 500-3.
- 682 KOPPENOL, W. H., BOUNDS, P. L. & DANG, C. V. 2011. Otto Warburg's contributions to  
683 current concepts of cancer metabolism. *Nat Rev Cancer*, 11, 325-37.
- 684 LAMONTE, G., TANG, X., CHEN, J. L., WU, J., DING, C. K., KEENAN, M. M.,  
685 SANGOKOYA, C., KUNG, H. N., ILKAYEVA, O., BOROS, L. G., NEWGARD, C. B.  
686 & CHI, J. T. 2013. Acidosis induces reprogramming of cellular metabolism to mitigate  
687 oxidative stress. *Cancer Metab*, 1, 23.
- 688 LI, M. V., CHEN, W., HARMANCEY, R. N., NUOTIO-ANTAR, A. M., IMAMURA, M.,  
689 SAHA, P., TAEGTMEYER, H. & CHAN, L. 2010. Glucose-6-phosphate mediates  
690 activation of the carbohydrate responsive binding protein (ChREBP). *Biochem Biophys*  
691 *Res Commun*, 395, 395-400.
- 692 LIM, J. Y., YOON, S. O., HONG, S. W., KIM, J. W., CHOI, S. H. & CHO, J. Y. 2012. Thioredoxin  
693 and thioredoxin-interacting protein as prognostic markers for gastric cancer recurrence.  
694 *World J Gastroenterol*, 18, 5581-8.

- 695 MA, L., TSATSOS, N. G. & TOWLE, H. C. 2005. Direct role of ChREBP.Mlx in regulating  
696 hepatic glucose-responsive genes. *J Biol Chem*, 280, 12019-27.
- 697 MCFERRIN, L. G. & ATCHLEY, W. R. 2012. A novel N-terminal domain may dictate the  
698 glucose response of Mondo proteins. *PLoS One*, 7, e34803.
- 699 MINN, A. H., HAFELE, C. & SHALEV, A. 2005. Thioredoxin-interacting protein is stimulated  
700 by glucose through a carbohydrate response element and induces beta-cell apoptosis.  
701 *Endocrinology*, 146, 2397-405.
- 702 MOON, Y. A. 2017. The SCAP/SREBP Pathway: A Mediator of Hepatic Steatosis. *Endocrinol*  
703 *Metab (Seoul)*, 32, 6-10.
- 704 O'SHEA, J. M. & AYER, D. E. 2013. Coordination of nutrient availability and utilization by  
705 MAX- and MLX-centered transcription networks. *Cold Spring Harb Perspect Med*, 3,  
706 a014258.
- 707 OSLOWSKI, C. M., HARA, T., O'SULLIVAN-MURPHY, B., KANEKURA, K., LU, S., HARA,  
708 M., ISHIGAKI, S., ZHU, L. J., HAYASHI, E., HUI, S. T., GREINER, D., KAUFMAN,  
709 R. J., BORTELL, R. & URANO, F. 2012. Thioredoxin-interacting protein mediates ER  
710 stress-induced beta cell death through initiation of the inflammasome. *Cell Metab*, 16, 265-  
711 73.
- 712 PAVLOVA, N. N. & THOMPSON, C. B. 2016. The Emerging Hallmarks of Cancer Metabolism.  
713 *Cell Metab*, 23, 27-47.
- 714 PEREIRA, B., CHIN, S. F., RUEDA, O. M., VOLLAN, H. K., PROVENZANO, E.,  
715 BARDWELL, H. A., PUGH, M., JONES, L., RUSSELL, R., SAMMUT, S. J., TSUI, D.  
716 W., LIU, B., DAWSON, S. J., ABRAHAM, J., NORTHEN, H., PEDEN, J. F.,  
717 MUKHERJEE, A., TURASHVILI, G., GREEN, A. R., MCKINNEY, S., OLOUMI, A.,  
718 SHAH, S., ROSENFELD, N., MURPHY, L., BENTLEY, D. R., ELLIS, I. O.,  
719 PURUSHOTHAM, A., PINDER, S. E., BORRESEN-DALE, A. L., EARL, H. M.,  
720 PHAROAH, P. D., ROSS, M. T., APARICIO, S. & CALDAS, C. 2016. The somatic  
721 mutation profiles of 2,433 breast cancers refines their genomic and transcriptomic  
722 landscapes. *Nat Commun*, 7, 11479.
- 723 PETERSEN, M. C., VATNER, D. F. & SHULMAN, G. I. 2017. Regulation of hepatic glucose  
724 metabolism in health and disease. *Nat Rev Endocrinol*, 13, 572-587.

- 725 PETERSON, C. W., STOLTZMAN, C. A., SIGHINOLFI, M. P., HAN, K. S. & AYER, D. E.  
726 2010. Glucose controls nuclear accumulation, promoter binding, and transcriptional  
727 activity of the MondoA-Mlx heterodimer. *Mol Cell Biol*, 30, 2887-95.
- 728 PETRIE, J. L., AL-OANZI, Z. H., ARDEN, C., TUDHOPE, S. J., MANN, J., KIESWICH, J.,  
729 YAQOOB, M. M., TOWLE, H. C. & AGIUS, L. 2013. Glucose induces protein targeting  
730 to glycogen in hepatocytes by fructose 2,6-bisphosphate-mediated recruitment of MondoA  
731 to the promoter. *Mol Cell Biol*, 33, 725-38.
- 732 RESHKIN, S. J., BELLIZZI, A., CALDEIRA, S., ALBARANI, V., MALANCHI, I., POIGNEE,  
733 M., ALUNNI-FABBRONI, M., CASAVOLA, V. & TOMMASINO, M. 2000. Na<sup>+</sup>/H<sup>+</sup>  
734 exchanger-dependent intracellular alkalization is an early event in malignant  
735 transformation and plays an essential role in the development of subsequent  
736 transformation-associated phenotypes. *FASEB J*, 14, 2185-97.
- 737 RICHARDS, P., OURABAH, S., MONTAGNE, J., BURNOL, A. F., POSTIC, C. &  
738 GUILMEAU, S. 2017. MondoA/ChREBP: The usual suspects of transcriptional glucose  
739 sensing; Implication in pathophysiology. *Metabolism*, 70, 133-151.
- 740 ROBEY, R. B. & HAY, N. 2006. Mitochondrial hexokinases, novel mediators of the antiapoptotic  
741 effects of growth factors and Akt. *Oncogene*, 25, 4683-96.
- 742 SANS, C. L., SATTERWHITE, D. J., STOLTZMAN, C. A., BREEN, K. T. & AYER, D. E. 2006.  
743 MondoA-Mlx heterodimers are candidate sensors of cellular energy status: mitochondrial  
744 localization and direct regulation of glycolysis. *Mol Cell Biol*, 26, 4863-71.
- 745 SHALEV, A. 2014. Minireview: Thioredoxin-interacting protein: regulation and function in the  
746 pancreatic beta-cell. *Mol Endocrinol*, 28, 1211-20.
- 747 SHEN, L., O'SHEA, J. M., KAADIGE, M. R., CUNHA, S., WILDE, B. R., COHEN, A. L.,  
748 WELM, A. L. & AYER, D. E. 2015. Metabolic reprogramming in triple-negative breast  
749 cancer through Myc suppression of TXNIP. *Proc Natl Acad Sci U S A*, 112, 5425-30.
- 750 STOLTZMAN, C. A., KAADIGE, M. R., PETERSON, C. W. & AYER, D. E. 2011. MondoA  
751 senses non-glucose sugars: regulation of thioredoxin-interacting protein (TXNIP) and the  
752 hexose transport curb. *J Biol Chem*, 286, 38027-34.
- 753 STOLTZMAN, C. A., PETERSON, C. W., BREEN, K. T., MUOIO, D. M., BILLIN, A. N. &  
754 AYER, D. E. 2008. Glucose sensing by MondoA:Mlx complexes: a role for hexokinases  
755 and direct regulation of thioredoxin-interacting protein expression. *Proc Natl Acad Sci U*  
756 *S A*, 105, 6912-7.

- 757 VERSARI, S., LONGINOTTI, G., BARENGHI, L., MAIER, J. A. & BRADAMANTE, S. 2013.  
758 The challenging environment on board the International Space Station affects endothelial  
759 cell function by triggering oxidative stress through thioredoxin interacting protein  
760 overexpression: the ESA-SPHINX experiment. *FASEB J*, 27, 4466-75.
- 761 WAHL, M. L., POOLER, P. M., BRIAND, P., LEEPER, D. B. & OWEN, C. S. 2000. Intracellular  
762 pH regulation in a nonmalignant and a derived malignant human breast cell line. *J Cell*  
763 *Physiol*, 183, 373-80.
- 764 WARBURG, O. 1925. The Metabolism of Carcinoma Cells. *American Association for Cancer*  
765 *Research Journals*, 9, 148-163.
- 766 WEBB, B. A., CHIMENTI, M., JACOBSON, M. P. & BARBER, D. L. 2011. Dysregulated pH:  
767 a perfect storm for cancer progression. *Nat Rev Cancer*, 11, 671-7.
- 768 WILSON, J. E. 2003. Isozymes of mammalian hexokinase: structure, subcellular localization and  
769 metabolic function. *J Exp Biol*, 206, 2049-57.
- 770 WOLFSON, R. L. & SABATINI, D. M. 2017. The Dawn of the Age of Amino Acid Sensors for  
771 the mTORC1 Pathway. *Cell Metab*, 26, 301-309.
- 772 WU, N., ZHENG, B., SHAYWITZ, A., DAGON, Y., TOWER, C., BELLINGER, G., SHEN, C.  
773 H., WEN, J., ASARA, J., MCGRAW, T. E., KAHN, B. B. & CANTLEY, L. C. 2013.  
774 AMPK-dependent degradation of TXNIP upon energy stress leads to enhanced glucose  
775 uptake via GLUT1. *Mol Cell*, 49, 1167-75.
- 776 YU, F. X., CHAI, T. F., HE, H., HAGEN, T. & LUO, Y. 2010. Thioredoxin-interacting protein  
777 (Txnip) gene expression: sensing oxidative phosphorylation status and glycolytic rate. *J*  
778 *Biol Chem*, 285, 25822-30.
- 779 ZAID, H., ABU-HAMAD, S., ISRAELSON, A., NATHAN, I. & SHOSHAN-BARMATZ, V.  
780 2005. The voltage-dependent anion channel-1 modulates apoptotic cell death. *Cell Death*  
781 *Differ*, 12, 751-60.
- 782

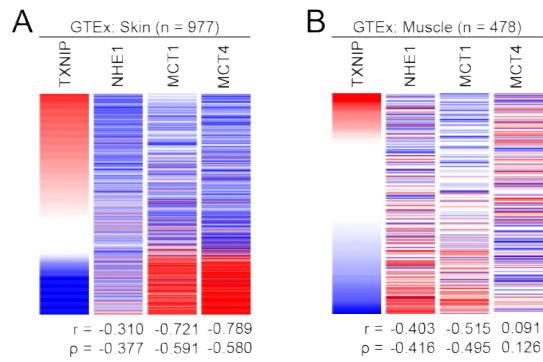

783

784 **Figure 1 – figure supplement 1. TXNIP correlates with genes that regulate intracellular**

785 **pH.** Heatmaps depicting the expression of TXNIP mRNA compared to MCT4, MCT1 and

786 NHE1 for normal (A) skin and (B) muscle tissues. All expression data was collected from GTEx.

787 Spearman and Pearson correlation statistics are reported as r and  $\rho$ , respectively.

788



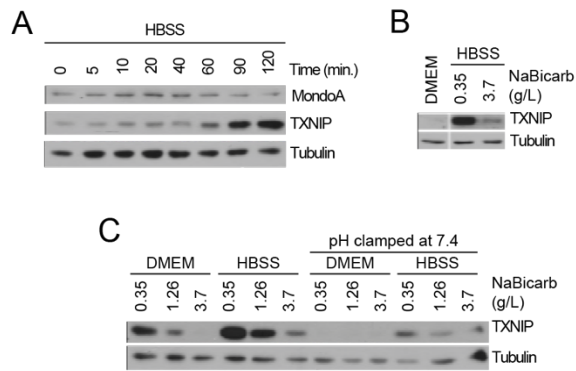

789

790 **Figure 2 – figure supplement 1. Acidosis drives MondoA transcriptional activity. (A)**

791 TXNIP and MondoA protein levels in MEFs treated with HBSS as determined immunoblotting.

792 (B) TXNIP protein levels of MEFs treated with DMEM, HBSS and HBSS supplemented with

793 sodium bicarbonate to the same amount as DMEM (3.7 g/L). (C) TXNIP protein levels in MEFs

794 treated with DMEM and HBSS containing the indicated amounts of sodium bicarbonate.

795 Additionally, the same treatments were clamped to pH 7.4 by adding 25mM HEPES and

796 adjusting the pH with NaOH. \*\*\*p<0.001

797

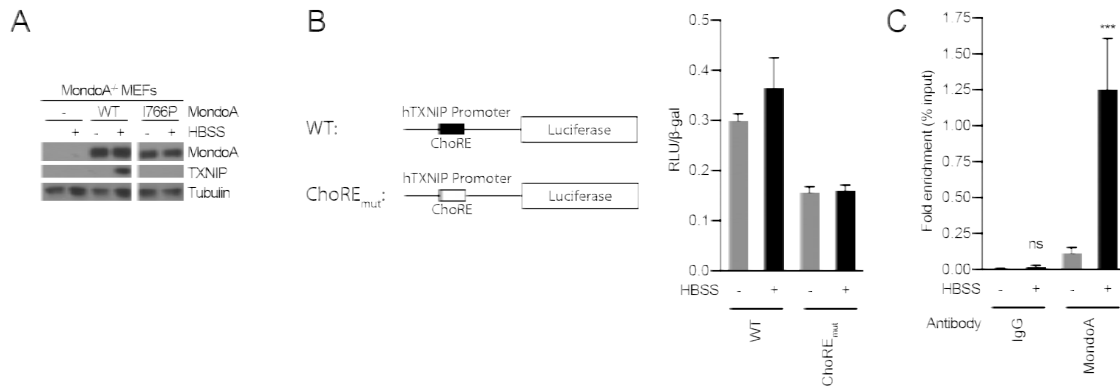

798

799 **Figure 2 – figure supplement 1. Acidosis drives MondoA transcriptional activity. (A)**

800 Immunoblot examining TXNIP induction in response to HBSS in MondoA-knockout MEFs

801 complemented with empty vector, wild-type MondoA or MondoA(I766P). (B) Schematic

802 depicting the TXNIP-promoter luciferase reporter constructs. A construct was made that

803 contained a mutation in the carbohydrate-responsive element (ChoRE<sub>mut</sub>). Luciferase constructs

804 were transfected into MEFs and HBSS treatment results in a slight induction of luciferase. Using

805 the ChoRE<sub>mut</sub> TXNIP promoter, initial luciferase expression was lower and HBSS treatment had

806 no effect on luciferase. (C) Chromatin-immunoprecipitation performed on MEFs treated with

807 HBSS. Antibodies against MondoA and IgG were used. \*\*\*p<0.001; ns – not significant

808

809 **Figure 3 – table supplement 1. Differentially regulated genes and overrepresentation**  
810 **analysis (related to Figure 2)**

811

812 **Figure 3 – table supplement 2. Enriched gene sets from GSEA (related to Figure 2)**

813

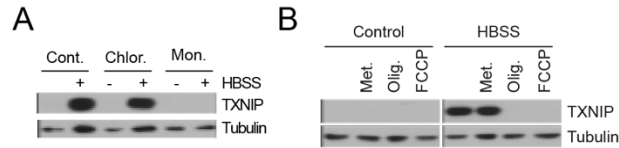

814

815 **Figure 4 – figure supplement 1. Acidosis-driven MondoA transcriptional activity requires**

816 **mitochondrial ATP production. (A) TXNIP protein levels in MEFs treated with ionophores**

817 chloroquine (Chlor., 25 μM) and monensin (Mon., 5 μM), which cause lysosomal and cytosolic

818 alkalization, respectively. (B) TXNIP protein levels in MEFs treated with HBSS and the

819 mitochondrial ionophore FCCP or the ETC complex inhibitors metformin (Met., 1 mM) and

820 oligomycin (Olig., 1 μM).

821

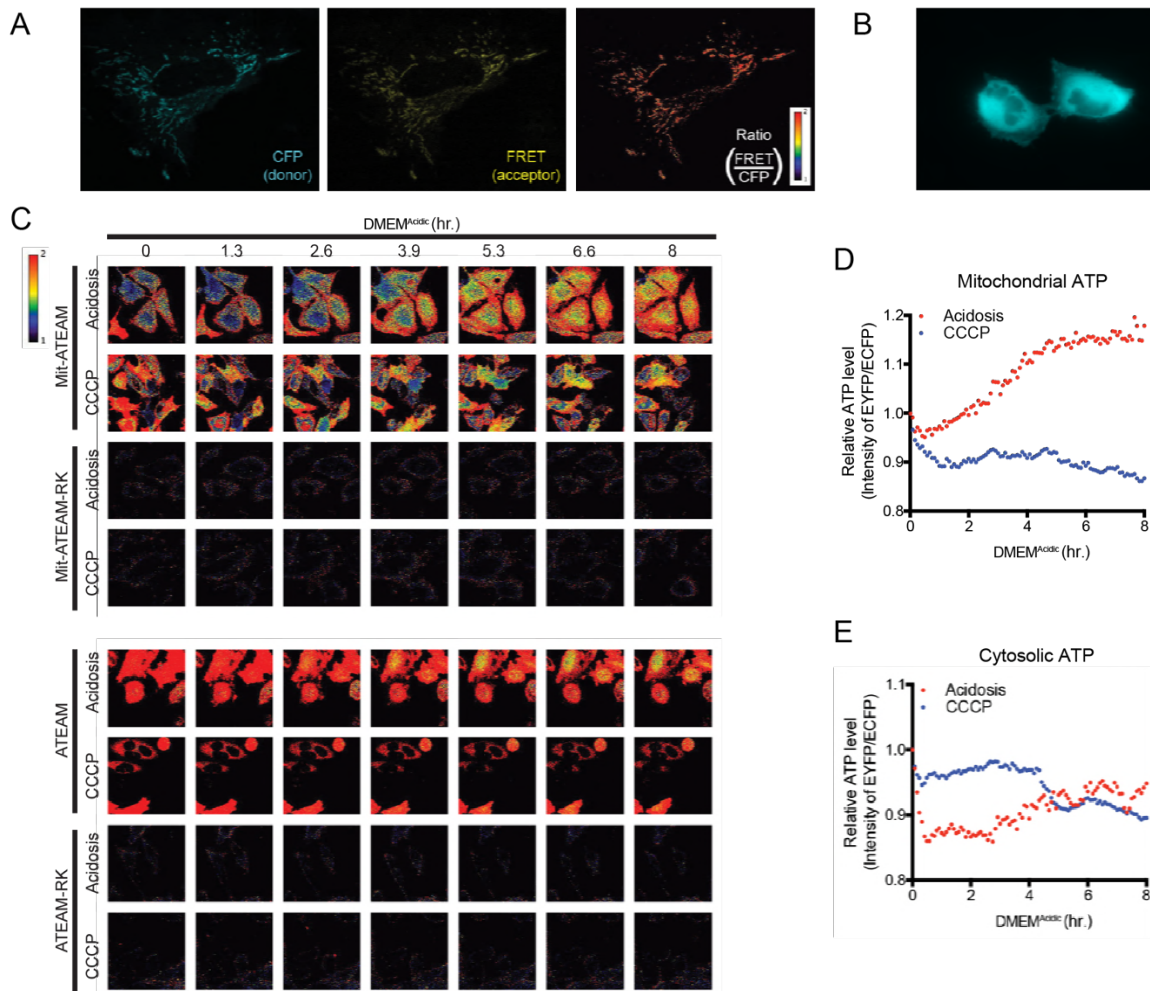

822

823 **Figure 5 – figure supplement 1. Acidosis drives synthesis of mitochondrial ATP. (A)**

824 Confocal images at 60X of Mit-ATEAM expressed in HeLa cells. Shown are the CFP and FRET

825 channels as well as the ratio of FRET to CFP (indicating ATP). (B) Widefield image at 60X of

826 ATEAM. CFP channel only is shown. (C) Confocal images of Mit-ATEAM and Mit-

827 ATEAM(R122K/R126K) in HeLa cells. Cells were treated with DMEM<sup>Acidic</sup> or CCCP (1 μM)

828 for 8 hours. Images are pseudo-colored according to the FRET/CFP ratio. Notably, the

829 FRET/CFP ratios for Mit-ATEAM(R122K/R126K) and ATEAM(R122K/R126K) was negligible

830 compared to non-mutated constructs. Quantification of (D) mitochondrial ATP and (E) cytosolic

831 ATP. Confocal images of ATEAM and ATEAM(R122K/R126K) in HeLa cells.
